# Supplementary material for: Increases in soil and woody biomass carbon stocks as a result of rangeland riparian restoration
Source: Carbon Balance Manag. 2020 Jul 31;15:16. doi: 10.1186/s13021-020-00150-7 (PMC7395391; doi:10.1186/s13021-020-00150-7)
Supplement: Supplementary file 1 — Additional file 1: Archived data. Archived data to accompany CBAM-D-19-00053, “Increases in soil and woody biomass carbon stocks as a result of rangeland riparian restoration.” Consists of 4 sheets of data, “individual tree measurements,” “soil carbon by age & success,” “soil properties by landform,” and “biomass C by age and success,” plus a “metadata” sheet explaining all the abbreviations in the other sheets. [file 13021_2020_150_MOESM1_ESM.xlsx]

## Sheet: individual tree meas
AGE	SITE	LANDFORM	STEM#	SITEPLOT	UNIQUESTEM	HABIT	SPECIES	DBH_CM	ABG_KG
26	ALP1	Channel	1	ALP1C	ALP1C-1	SHRUB	RUDI	3	0.522
26	ALP1	Channel	2	ALP1C	ALP1C-2	SHRUB	RUDI	3	0.522
26	ALP1	Channel	3	ALP1C	ALP1C-3	SHRUB	RUDI	3	0.522
26	ALP1	Channel	4	ALP1C	ALP1C-4	SHRUB	RUDI	3	0.522
26	ALP1	Channel	5	ALP1C	ALP1C-5	TREE	SALA	21.336	163.179
26	ALP1	Channel	6	ALP1C	ALP1C-6	TREE	SALA	12.192	42.9146
3	ALP2	Channel	0	ALP2C	ALP2C-0
17	ALP3	Channel	0	ALP3C	ALP3C-0
16	ALP4	Channel	1	ALP4C	ALP4C-1	SHRUB	RUDI	3	0.522
16	ALP4	Channel	2	ALP4C	ALP4C-2	SHRUB	RUDI	3	0.522
6	BLOOM1	Channel	0	BLOOM1C	BLOOM1C-0
0	BLOOM2	Channel	0	BLOOM2C	BLOOM2C-0
21	DRG1	Channel	1	DRG1C	DRG1C-1	SHRUB	RUDI	1.5	0.261
21	DRG1	Channel	2	DRG1C	DRG1C-2	SHRUB	RUDI	1.5	0.261
21	DRG1	Channel	3	DRG1C	DRG1C-3	SHRUB	RUDI	1.5	0.261
21	DRG1	Channel	4	DRG1C	DRG1C-4	TREE	ALRH	21.336	163.179
21	DRG1	Channel	5	DRG1C	DRG1C-5	TREE	ALRH	9.144	21.598
21	DRG1	Channel	6	DRG1C	DRG1C-6	TREE	SALA	6.096	8.2061
0	DRG2	Channel	0	DRG2C	DRG2C-0
9	EDG1	Channel	1	EDG1C	EDG1C-1	TREE	SALA	3.048	1.56916
9	EDG1	Channel	2	EDG1C	EDG1C-2	TREE	SALA	9.144	21.598
33	FCV1	Channel	1	FCV1C	FCV1C-1	SHRUB	RUDI	3	0.522
33	FCV1	Channel	10	FCV1C	FCV1C-10	SHRUB	RUDI	1.5	0.261
33	FCV1	Channel	11	FCV1C	FCV1C-11	SHRUB	RUDI	1.5	0.261
33	FCV1	Channel	12	FCV1C	FCV1C-12	SHRUB	RUDI	1.5	0.261
33	FCV1	Channel	13	FCV1C	FCV1C-13	SHRUB	RUDI	1.5	0.261
33	FCV1	Channel	14	FCV1C	FCV1C-14	SHRUB	RUDI	1.5	0.261
33	FCV1	Channel	15	FCV1C	FCV1C-15	SHRUB	RUDI	1.5	0.261
33	FCV1	Channel	16	FCV1C	FCV1C-16	SHRUB	RUDI	1.5	0.261
33	FCV1	Channel	17	FCV1C	FCV1C-17	SHRUB	RUDI	1.5	0.261
33	FCV1	Channel	18	FCV1C	FCV1C-18	TREE	SALA	27.432	297.275
33	FCV1	Channel	19	FCV1C	FCV1C-19	TREE	SALU	39.624	715.018
33	FCV1	Channel	2	FCV1C	FCV1C-2	SHRUB	RUDI	3	0.522
33	FCV1	Channel	20	FCV1C	FCV1C-20	TREE	SALU	18.288	112.949
33	FCV1	Channel	3	FCV1C	FCV1C-3	SHRUB	RUDI	3	0.522
33	FCV1	Channel	4	FCV1C	FCV1C-4	SHRUB	RUDI	3	0.522
33	FCV1	Channel	5	FCV1C	FCV1C-5	SHRUB	RUDI	3	0.522
33	FCV1	Channel	6	FCV1C	FCV1C-6	SHRUB	RUDI	3	0.522
33	FCV1	Channel	7	FCV1C	FCV1C-7	SHRUB	RUDI	3	0.522
33	FCV1	Channel	8	FCV1C	FCV1C-8	SHRUB	RUDI	1.5	0.261
33	FCV1	Channel	9	FCV1C	FCV1C-9	SHRUB	RUDI	1.5	0.261
0	JKR1	Channel	0	JKR1C	JKR1C-0
13	JKT1	Channel	1	JKT1C	JKT1C-1	TREE	SALA	18.288	112.949
13	JKT1	Channel	2	JKT1C	JKT1C-2	TREE	SALA	12.192	42.9146
14	JKT2	Channel	1	JKT2C	JKT2C-1	SHRUB	RUDI	1.5	0.261
14	JKT2	Channel	2	JKT2C	JKT2C-2	SHRUB	RUDI	1.5	0.261
14	JKT2	Channel	3	JKT2C	JKT2C-3	SHRUB	RUDI	1.5	0.261
14	JKT2	Channel	4	JKT2C	JKT2C-4	SHRUB	RUDI	1.5	0.261
14	JKT2	Channel	5	JKT2C	JKT2C-5	SHRUB	RUDI	1.5	0.261
14	JKT2	Channel	6	JKT2C	JKT2C-6	TREE	SALA	27.432	297.275
14	JKT2	Channel	7	JKT2C	JKT2C-7	TREE	SALA	15.2	72.64
14	JKT2	Channel	8	JKT2C	JKT2C-8	TREE	SALA	9.144	21.598
2	JKT3	Channel	0	JKT3C	JKT3C-0
36	JKT4	Channel	0	JKT4C	JKT4C-0
27	KEN1	Channel	0	KEN1C	KEN1C-0
0	LAM1	Channel	0	LAM1C	LAM1C-0
37	LCV1	Channel	1	LCV1C	LCV1C-1	SHRUB	RUDI	1.5	0.261
37	LCV1	Channel	10	LCV1C	LCV1C-10	TREE	SALA	15.24	73.0971
37	LCV1	Channel	11	LCV1C	LCV1C-11	TREE	SALA	6.096	8.2061
37	LCV1	Channel	12	LCV1C	LCV1C-12	TREE	SALV	12.192	42.9146
37	LCV1	Channel	2	LCV1C	LCV1C-2	SHRUB	RUDI	1.5	0.261
37	LCV1	Channel	3	LCV1C	LCV1C-3	SHRUB	RUDI	1.5	0.261
37	LCV1	Channel	4	LCV1C	LCV1C-4	SHRUB	RUDI	1.5	0.261
37	LCV1	Channel	5	LCV1C	LCV1C-5	SHRUB	RUDI	1.5	0.261
37	LCV1	Channel	6	LCV1C	LCV1C-6	SHRUB	RUDI	1.5	0.261
37	LCV1	Channel	7	LCV1C	LCV1C-7	SHRUB	RUDI	1.5	0.261
37	LCV1	Channel	8	LCV1C	LCV1C-8	SHRUB	RUDI	1.5	0.261
37	LCV1	Channel	9	LCV1C	LCV1C-9	SHRUB	RUDI	1.5	0.261
11	LCV2	Channel	1	LCV2C	LCV2C-1	TREE	SALA	9.144	21.598
12	MCS1	Channel	1	MCS1C	MCS1C-1	SHRUB	RUDI	1.5	0.261
12	MCS1	Channel	2	MCS1C	MCS1C-2	SHRUB	RUDI	1.5	0.261
12	MCS1	Channel	3	MCS1C	MCS1C-3	SHRUB	RUDI	1.5	0.261
12	MCS1	Channel	4	MCS1C	MCS1C-4	SHRUB	RUDI	1.5	0.261
12	MCS1	Channel	5	MCS1C	MCS1C-5	TREE	SALA	9.144	21.598
12	MCS1	Channel	6	MCS1C	MCS1C-6	TREE	SALA	6.096	8.2061
12	MCS1	Channel	7	MCS1C	MCS1C-7	TREE	SALA	3.048	1.56916
12	MCS2	Channel	1	MCS2C	MCS2C-1	SHRUB	RUDI	1.5	0.261
12	MCS2	Channel	2	MCS2C	MCS2C-2	SHRUB	RUDI	1.5	0.261
12	MCS2	Channel	3	MCS2C	MCS2C-3	SHRUB	RUDI	1.5	0.261
12	MCS2	Channel	4	MCS2C	MCS2C-4	SHRUB	RUDI	1.5	0.261
12	MCS2	Channel	5	MCS2C	MCS2C-5	SHRUB	RUDI	1.5	0.261
12	MCS2	Channel	6	MCS2C	MCS2C-6	SHRUB	RUDI	1.5	0.261
12	MCS2	Channel	7	MCS2C	MCS2C-7	TREE	ALRH	39.624	715.018
12	MCS2	Channel	8	MCS2C	MCS2C-8	TREE	ALRH	15.24	73.0971
0	MM1	Channel	0	MM1C	MM1C-0
0	MM2	Channel	1	MM2C	MM2C-1	SHRUB	RUDI	1.5	0.261
0	MM2	Channel	2	MM2C	MM2C-2	SHRUB	RUDI	1.5	0.261
0	MM2	Channel	3	MM2C	MM2C-3	SHRUB	RUUR	1.5	0.261
9	Murphy1	Channel	1	Murphy1C	Murphy1C-1	TREE	SALA	3.048	1.56916
0	Murphy2	Channel	0	Murphy2C	Murphy2C-0
0	Murphy3	Channel	0	Murphy3C	Murphy3C-0
7	Murphy4	Channel	1	Murphy4C	Murphy4C-1	TREE	SALA	18.288	112.949
7	Murphy4	Channel	2	Murphy4C	Murphy4C-2	TREE	SALA	9.144	21.598
30	OASP1	Channel	1	OASP1C	OASP1C-1	TREE	SALA	12.192	42.9146
30	OASP1	Channel	2	OASP1C	OASP1C-2	TREE	SALA	18.288	112.949
30	OASP1	Channel	3	OASP1C	OASP1C-3	TREE	SALU	15.24	73.0971
16	PMN1	Channel	1	PMN1C	PMN1C-1	TREE	SALU	24.384	224.426
0	PMN2	Channel	0	PMN2C	PMN2C-0
28	RJG1	Channel	1	RJG1C	RJG1C-1	SHRUB	RUUR	1.5	0.261
28	RJG1	Channel	2	RJG1C	RJG1C-2	SHRUB	RUUR	1.5	0.261
28	RJG1	Channel	3	RJG1C	RJG1C-3	SHRUB	RUUR	1.5	0.261
28	RJG1	Channel	4	RJG1C	RJG1C-4	SHRUB	RUUR	1.5	0.261
28	RJG1	Channel	5	RJG1C	RJG1C-5	SHRUB	RUUR	1.5	0.261
28	RJG1	Channel	6	RJG1C	RJG1C-6	SHRUB	RUUR	1.5	0.261
28	RJG1	Channel	7	RJG1C	RJG1C-7	SHRUB	RUUR	1.5	0.261
39	RJG1	Channel	8	RJG1C	RJG1C-8	TREE	SALA	3.048	1.56916
28	RJG2	Channel	1	RJG2C	RJG2C-1	SHRUB	RUUR	1.5	0.261
28	RJG2	Channel	10	RJG2C	RJG2C-10	SHRUB	RUUR	1.5	0.261
28	RJG2	Channel	11	RJG2C	RJG2C-11	SHRUB	RUUR	1.5	0.261
28	RJG2	Channel	12	RJG2C	RJG2C-12	TREE	SALA	6.096	8.2061
28	RJG2	Channel	13	RJG2C	RJG2C-13	TREE	SALA	12.192	42.9146
28	RJG2	Channel	2	RJG2C	RJG2C-2	SHRUB	RUUR	1.5	0.261
28	RJG2	Channel	3	RJG2C	RJG2C-3	SHRUB	RUUR	1.5	0.261
28	RJG2	Channel	4	RJG2C	RJG2C-4	SHRUB	RUUR	1.5	0.261
28	RJG2	Channel	5	RJG2C	RJG2C-5	SHRUB	RUUR	1.5	0.261
28	RJG2	Channel	6	RJG2C	RJG2C-6	SHRUB	RUUR	1.5	0.261
28	RJG2	Channel	7	RJG2C	RJG2C-7	SHRUB	RUUR	1.5	0.261
28	RJG2	Channel	8	RJG2C	RJG2C-8	SHRUB	RUUR	1.5	0.261
28	RJG2	Channel	9	RJG2C	RJG2C-9	SHRUB	RUUR	1.5	0.261
9	SANG1	Channel	0	SANG1C	SANG1C-0
15	SMG1	Channel	1	SMG1C	SMG1C-1	SHRUB	RUDI	3	0.522
15	SMG1	Channel	2	SMG1C	SMG1C-2	SHRUB	RUDI	3	0.522
15	SMG1	Channel	3	SMG1C	SMG1C-3	SHRUB	RUDI	3	0.522
15	SMG1	Channel	4	SMG1C	SMG1C-4	SHRUB	RUDI	3	0.522
15	SMG1	Channel	5	SMG1C	SMG1C-5	TREE	SALA	21.336	163.179
15	SMG1	Channel	6	SMG1C	SMG1C-6	TREE	SALA	12.192	42.9146
15	SMG1	Channel	7	SMG1C	SMG1C-7	TREE	SALU	27.432	297.275
15	SMG1	Channel	8	SMG1C	SMG1C-8	TREE	SALU	15.24	73.0971
45	SSU1	Channel	1	SSU1C	SSU1C-1	SHRUB	RUDI	1.5	0.261
45	SSU1	Channel	10	SSU1C	SSU1C-10	TREE	SALA	33.528	479.91
45	SSU1	Channel	11	SSU1C	SSU1C-11	TREE	SALA	6.096	8.2061
45	SSU1	Channel	2	SSU1C	SSU1C-2	SHRUB	RUDI	1.5	0.261
45	SSU1	Channel	3	SSU1C	SSU1C-3	SHRUB	RUDI	1.5	0.261
45	SSU1	Channel	4	SSU1C	SSU1C-4	SHRUB	RUDI	3	0.522
45	SSU1	Channel	5	SSU1C	SSU1C-5	SHRUB	RUDI	3	0.522
45	SSU1	Channel	6	SSU1C	SSU1C-6	SHRUB	RUDI	3	0.522
45	SSU1	Channel	7	SSU1C	SSU1C-7	SHRUB	RUDI	3	0.522
45	SSU1	Channel	8	SSU1C	SSU1C-8	SHRUB	RUDI	3	0.522
45	SSU1	Channel	9	SSU1C	SSU1C-9	TREE	SALA	15.24	73.0971
1	TCR1	Channel	0	TCR1C	TCR1C-0
41	USCG1	Channel	1	USCG1C	USCG1C-1	TREE	SALA	39.624	715.018
0	WCR1	Channel	0	WCR1C	WCR1C-0
23	WCR2	Channel	1	WCR2C	WCR2C-1	SHRUB	RUUR	1.5	0.261
23	WCR2	Channel	10	WCR2C	WCR2C-10	SHRUB	RUUR	1.5	0.261
23	WCR2	Channel	11	WCR2C	WCR2C-11	SHRUB	RUUR	1.5	0.261
23	WCR2	Channel	12	WCR2C	WCR2C-12	SHRUB	RUUR	1.5	0.261
23	WCR2	Channel	13	WCR2C	WCR2C-13	SHRUB	RUUR	1.5	0.261
23	WCR2	Channel	14	WCR2C	WCR2C-14	SHRUB	RUUR	1.5	0.261
23	WCR2	Channel	15	WCR2C	WCR2C-15	SHRUB	RUUR	1.5	0.261
23	WCR2	Channel	16	WCR2C	WCR2C-16	TREE	ALRH	18.288	112.949
23	WCR2	Channel	17	WCR2C	WCR2C-17	TREE	ALRH	18.288	112.949
23	WCR2	Channel	18	WCR2C	WCR2C-18	TREE	ALRH	24.384	224.426
23	WCR2	Channel	19	WCR2C	WCR2C-19	TREE	SALA	9.144	21.598
23	WCR2	Channel	2	WCR2C	WCR2C-2	SHRUB	RUUR	1.5	0.261
23	WCR2	Channel	20	WCR2C	WCR2C-20	TREE	SALA	3.048	1.56916
23	WCR2	Channel	3	WCR2C	WCR2C-3	SHRUB	RUUR	1.5	0.261
23	WCR2	Channel	4	WCR2C	WCR2C-4	SHRUB	RUUR	1.5	0.261
23	WCR2	Channel	5	WCR2C	WCR2C-5	SHRUB	RUUR	1.5	0.261
23	WCR2	Channel	6	WCR2C	WCR2C-6	SHRUB	RUUR	1.5	0.261
23	WCR2	Channel	7	WCR2C	WCR2C-7	SHRUB	RUUR	1.5	0.261
23	WCR2	Channel	8	WCR2C	WCR2C-8	SHRUB	RUUR	1.5	0.261
23	WCR2	Channel	9	WCR2C	WCR2C-9	SHRUB	RUUR	1.5	0.261
21	WCR3	Channel	1	WCR3C	WCR3C-1	SHRUB	RUUR	1.5	0.261
21	WCR3	Channel	2	WCR3C	WCR3C-2	SHRUB	RUUR	1.5	0.261
21	WCR3	Channel	3	WCR3C	WCR3C-3	SHRUB	RUUR	1.5	0.261
21	WCR3	Channel	4	WCR3C	WCR3C-4	SHRUB	RUUR	1.5	0.261
21	WCR3	Channel	5	WCR3C	WCR3C-5	SHRUB	RUUR	1.5	0.261
21	WCR3	Channel	6	WCR3C	WCR3C-6	TREE	ALRH	9.144	21.598
21	WCR3	Channel	7	WCR3C	WCR3C-7	TREE	ALRH	12.192	42.9146
24	WCR4	Channel	1	WCR4C	WCR4C-1	TREE	ALRH	21.336	163.179
24	WCR4	Channel	2	WCR4C	WCR4C-2	TREE	ALRH	12.192	42.9146
24	WCR4	Channel	3	WCR4C	WCR4C-3	TREE	ALRH	6.096	8.2061
3	XYZ1	Channel	0	XYZ1C	XYZ1C-0
26	ALP1	Floodplain	1	ALP1F	ALP1F-1	TREE	SALA	12.192	42.9146
26	ALP1	Floodplain	2	ALP1F	ALP1F-2	TREE	SALA	9.144	21.598
3	ALP2	Floodplain	0	ALP2F	ALP2F-0
17	ALP3	Floodplain	3	ALP3F	ALP3F-3	SHRUB	RUDI	3	0.522
17	ALP3	Floodplain	4	ALP3F	ALP3F-4	SHRUB	RUDI	3	0.522
17	ALP3	Floodplain	5	ALP3F	ALP3F-5	SHRUB	RUDI	3	0.522
17	ALP3	Floodplain	6	ALP3F	ALP3F-6	TREE	SALA	9.144	21.598
17	ALP3	Floodplain	7	ALP3F	ALP3F-7	TREE	SALA	6.096	8.2061
17	ALP3	Floodplain	8	ALP3F	ALP3F-8	TREE	SALA	15.24	73.0971
16	ALP4	Floodplain	1	ALP4F	ALP4F-1	SHRUB	RUDI	3	0.522
16	ALP4	Floodplain	10	ALP4F	ALP4F-10	SHRUB	RUDI	3	0.522
16	ALP4	Floodplain	11	ALP4F	ALP4F-11	SHRUB	RUDI	3	0.522
16	ALP4	Floodplain	12	ALP4F	ALP4F-12	SHRUB	RUDI	3	0.522
16	ALP4	Floodplain	13	ALP4F	ALP4F-13	TREE	SALA	21.336	163.179
16	ALP4	Floodplain	14	ALP4F	ALP4F-14	TREE	SALA	6.096	8.2061
16	ALP4	Floodplain	15	ALP4F	ALP4F-15	TREE	SALA	9.144	21.598
16	ALP4	Floodplain	2	ALP4F	ALP4F-2	SHRUB	RUDI	3	0.522
16	ALP4	Floodplain	3	ALP4F	ALP4F-3	SHRUB	RUDI	3	0.522
16	ALP4	Floodplain	4	ALP4F	ALP4F-4	SHRUB	RUDI	3	0.522
16	ALP4	Floodplain	5	ALP4F	ALP4F-5	SHRUB	RUDI	3	0.522
16	ALP4	Floodplain	6	ALP4F	ALP4F-6	SHRUB	RUDI	3	0.522
16	ALP4	Floodplain	7	ALP4F	ALP4F-7	SHRUB	RUDI	3	0.522
16	ALP4	Floodplain	8	ALP4F	ALP4F-8	SHRUB	RUDI	3	0.522
16	ALP4	Floodplain	9	ALP4F	ALP4F-9	SHRUB	RUDI	3	0.522
6	BLOOM1	Floodplain	0	BLOOM1F	BLOOM1F-0
0	BLOOM2	Floodplain	0	BLOOM2F	BLOOM2F-0
21	DRG1	Floodplain	1	DRG1F	DRG1F-1	SHRUB	RUDI	1.5	0.261
21	DRG1	Floodplain	10	DRG1F	DRG1F-10	SHRUB	RUDI	1.5	0.261
21	DRG1	Floodplain	11	DRG1F	DRG1F-11	SHRUB	RUDI	1.5	0.261
21	DRG1	Floodplain	12	DRG1F	DRG1F-12	SHRUB	RUDI	1.5	0.261
21	DRG1	Floodplain	13	DRG1F	DRG1F-13	SHRUB	RUDI	1.5	0.261
21	DRG1	Floodplain	14	DRG1F	DRG1F-14	SHRUB	RUDI	1.5	0.261
21	DRG1	Floodplain	15	DRG1F	DRG1F-15	SHRUB	RUDI	1.5	0.261
21	DRG1	Floodplain	16	DRG1F	DRG1F-16	SHRUB	SYAL	1.5
21	DRG1	Floodplain	17	DRG1F	DRG1F-17	SHRUB	SYAL	1.5
21	DRG1	Floodplain	18	DRG1F	DRG1F-18	SHRUB	SYAL	1.5
21	DRG1	Floodplain	19	DRG1F	DRG1F-19	SHRUB	SYAL	1.5
21	DRG1	Floodplain	2	DRG1F	DRG1F-2	SHRUB	RUDI	1.5	0.261
21	DRG1	Floodplain	20	DRG1F	DRG1F-20	SHRUB	SYAL	1.5
21	DRG1	Floodplain	21	DRG1F	DRG1F-21	SHRUB	SYAL	1.5
21	DRG1	Floodplain	22	DRG1F	DRG1F-22	SHRUB	SYAL	1.5
21	DRG1	Floodplain	23	DRG1F	DRG1F-23	TREE	ALRH	24.384	224.426
21	DRG1	Floodplain	24	DRG1F	DRG1F-24	TREE	SALA	12.192	42.9146
21	DRG1	Floodplain	25	DRG1F	DRG1F-25	TREE	SALA	6.096	8.2061
21	DRG1	Floodplain	3	DRG1F	DRG1F-3	SHRUB	RUDI	1.5	0.261
21	DRG1	Floodplain	4	DRG1F	DRG1F-4	SHRUB	RUDI	1.5	0.261
21	DRG1	Floodplain	5	DRG1F	DRG1F-5	SHRUB	RUDI	1.5	0.261
21	DRG1	Floodplain	6	DRG1F	DRG1F-6	SHRUB	RUDI	1.5	0.261
21	DRG1	Floodplain	7	DRG1F	DRG1F-7	SHRUB	RUDI	1.5	0.261
21	DRG1	Floodplain	8	DRG1F	DRG1F-8	SHRUB	RUDI	1.5	0.261
21	DRG1	Floodplain	9	DRG1F	DRG1F-9	SHRUB	RUDI	1.5	0.261
0	DRG2	Floodplain	0	DRG2F	DRG2F-0
9	EDG1	Floodplain	1	EDG1F	EDG1F-1	SHRUB	BAPI	6.096	10.623
9	EDG1	Floodplain	2	EDG1F	EDG1F-2	SHRUB	BAPI	6.096	10.623
9	EDG1	Floodplain	3	EDG1F	EDG1F-3	SHRUB	BAPI	6.096	10.623
9	EDG1	Floodplain	4	EDG1F	EDG1F-4	SHRUB	BAPI	6.096	10.623
9	EDG1	Floodplain	5	EDG1F	EDG1F-5	SHRUB	BAPI	3.048	3.26303
9	EDG1	Floodplain	6	EDG1F	EDG1F-6	SHRUB	BAPI	3.048	3.26303
9	EDG1	Floodplain	7	EDG1F	EDG1F-7	TREE	SALA	12.192	42.9146
9	EDG1	Floodplain	8	EDG1F	EDG1F-8	TREE	SALA	6.096	8.2061
9	EDG1	Floodplain	9	EDG1F	EDG1F-9	TREE	SALA	3.048	1.56916
33	FCV1	Floodplain	1	FCV1F	FCV1F-1	SHRUB	RUDI	3	0.522
33	FCV1	Floodplain	10	FCV1F	FCV1F-10	SHRUB	RUDI	3	0.522
33	FCV1	Floodplain	11	FCV1F	FCV1F-11	SHRUB	RUDI	3	0.522
33	FCV1	Floodplain	12	FCV1F	FCV1F-12	SHRUB	RUDI	3	0.522
33	FCV1	Floodplain	13	FCV1F	FCV1F-13	SHRUB	RUDI	3	0.522
33	FCV1	Floodplain	14	FCV1F	FCV1F-14	SHRUB	RUDI	3	0.522
33	FCV1	Floodplain	15	FCV1F	FCV1F-15	SHRUB	RUDI	3	0.522
33	FCV1	Floodplain	16	FCV1F	FCV1F-16	SHRUB	RUDI	3	0.522
33	FCV1	Floodplain	17	FCV1F	FCV1F-17	SHRUB	RUDI	3	0.522
33	FCV1	Floodplain	18	FCV1F	FCV1F-18	SHRUB	RUDI	3	0.522
33	FCV1	Floodplain	19	FCV1F	FCV1F-19	SHRUB	RUDI	3	0.522
33	FCV1	Floodplain	2	FCV1F	FCV1F-2	SHRUB	RUDI	3	0.522
33	FCV1	Floodplain	20	FCV1F	FCV1F-20	SHRUB	RUDI	3	0.522
33	FCV1	Floodplain	21	FCV1F	FCV1F-21	SHRUB	RUDI	3	0.522
33	FCV1	Floodplain	22	FCV1F	FCV1F-22	SHRUB	RUDI	3	0.522
33	FCV1	Floodplain	23	FCV1F	FCV1F-23	SHRUB	RUDI	3	0.522
33	FCV1	Floodplain	24	FCV1F	FCV1F-24	SHRUB	RUDI	3	0.522
33	FCV1	Floodplain	25	FCV1F	FCV1F-25	SHRUB	RUDI	3	0.522
33	FCV1	Floodplain	26	FCV1F	FCV1F-26	SHRUB	RUDI	1.5	0.261
33	FCV1	Floodplain	27	FCV1F	FCV1F-27	SHRUB	RUDI	1.5	0.261
33	FCV1	Floodplain	28	FCV1F	FCV1F-28	SHRUB	RUDI	1.5	0.261
33	FCV1	Floodplain	29	FCV1F	FCV1F-29	SHRUB	RUDI	1.5	0.261
33	FCV1	Floodplain	3	FCV1F	FCV1F-3	SHRUB	RUDI	3	0.522
33	FCV1	Floodplain	30	FCV1F	FCV1F-30	SHRUB	RUDI	1.5	0.261
33	FCV1	Floodplain	31	FCV1F	FCV1F-31	SHRUB	RUDI	1.5	0.261
33	FCV1	Floodplain	32	FCV1F	FCV1F-32	SHRUB	RUDI	1.5	0.261
33	FCV1	Floodplain	33	FCV1F	FCV1F-33	TREE	SALA	30.48	382.268
33	FCV1	Floodplain	34	FCV1F	FCV1F-34	TREE	SALA	9.144	21.598
33	FCV1	Floodplain	35	FCV1F	FCV1F-35	TREE	SALU	27.432	297.275
33	FCV1	Floodplain	36	FCV1F	FCV1F-36	TREE	SALU	39.624	715.018
33	FCV1	Floodplain	4	FCV1F	FCV1F-4	SHRUB	RUDI	3	0.522
33	FCV1	Floodplain	5	FCV1F	FCV1F-5	SHRUB	RUDI	3	0.522
33	FCV1	Floodplain	6	FCV1F	FCV1F-6	SHRUB	RUDI	3	0.522
33	FCV1	Floodplain	7	FCV1F	FCV1F-7	SHRUB	RUDI	3	0.522
33	FCV1	Floodplain	8	FCV1F	FCV1F-8	SHRUB	RUDI	3	0.522
33	FCV1	Floodplain	9	FCV1F	FCV1F-9	SHRUB	RUDI	3	0.522
0	JKR1	Floodplain	0	JKR1F	JKR1F-0
13	JKT1	Floodplain	1	JKT1F	JKT1F-1	TREE	SALA	18.288	112.949
13	JKT1	Floodplain	2	JKT1F	JKT1F-2	TREE	SALA	12.192	42.9146
14	JKT2	Floodplain	1	JKT2F	JKT2F-1	SHRUB	RUDI	1.5	0.261
14	JKT2	Floodplain	2	JKT2F	JKT2F-2	SHRUB	RUDI	1.5	0.261
14	JKT2	Floodplain	3	JKT2F	JKT2F-3	SHRUB	RUDI	1.5	0.261
14	JKT2	Floodplain	4	JKT2F	JKT2F-4	SHRUB	RUDI	1.5	0.261
14	JKT2	Floodplain	5	JKT2F	JKT2F-5	SHRUB	RUDI	1.5	0.261
14	JKT2	Floodplain	6	JKT2F	JKT2F-6	TREE	SALA	27.432	297.275
14	JKT2	Floodplain	7	JKT2F	JKT2F-7	TREE	SALA	18.288	112.949
14	JKT2	Floodplain	8	JKT2F	JKT2F-8	TREE	SALA	9.144	21.598
2	JKT3	Floodplain	1	JKT3F	JKT3F-1	SHRUB	RUDI	3	0.522
2	JKT3	Floodplain	2	JKT3F	JKT3F-2	SHRUB	RUDI	3	0.522
2	JKT3	Floodplain	3	JKT3F	JKT3F-3	SHRUB	RUDI	3	0.522
2	JKT3	Floodplain	4	JKT3F	JKT3F-4	SHRUB	RUDI	3	0.522
36	JKT4	Floodplain	1	JKT4F	JKT4F-1	SHRUB	RUDI	3	0.522
36	JKT4	Floodplain	10	JKT4F	JKT4F-10	SHRUB	RUDI	3	0.522
36	JKT4	Floodplain	11	JKT4F	JKT4F-11	SHRUB	RUDI	3	0.522
36	JKT4	Floodplain	12	JKT4F	JKT4F-12	SHRUB	RUDI	3	0.522
36	JKT4	Floodplain	13	JKT4F	JKT4F-13	SHRUB	RUDI	3	0.522
36	JKT4	Floodplain	14	JKT4F	JKT4F-14	SHRUB	RUDI	3	0.522
36	JKT4	Floodplain	15	JKT4F	JKT4F-15	SHRUB	RUDI	3	0.522
36	JKT4	Floodplain	16	JKT4F	JKT4F-16	SHRUB	RUDI	3	0.522
36	JKT4	Floodplain	17	JKT4F	JKT4F-17	SHRUB	RUDI	3	0.522
36	JKT4	Floodplain	18	JKT4F	JKT4F-18	SHRUB	RUDI	3	0.522
36	JKT4	Floodplain	19	JKT4F	JKT4F-19	SHRUB	RUDI	3	0.522
36	JKT4	Floodplain	2	JKT4F	JKT4F-2	SHRUB	RUDI	3	0.522
36	JKT4	Floodplain	20	JKT4F	JKT4F-20	SHRUB	RUDI	3	0.522
36	JKT4	Floodplain	21	JKT4F	JKT4F-21	SHRUB	RUUR	1.5	0.261
36	JKT4	Floodplain	22	JKT4F	JKT4F-22	SHRUB	RUUR	1.5	0.261
36	JKT4	Floodplain	23	JKT4F	JKT4F-23	SHRUB	RUUR	1.5	0.261
36	JKT4	Floodplain	24	JKT4F	JKT4F-24	SHRUB	RUUR	1.5	0.261
36	JKT4	Floodplain	25	JKT4F	JKT4F-25	SHRUB	RUUR	1.5	0.261
36	JKT4	Floodplain	26	JKT4F	JKT4F-26	SHRUB	RUUR	1.5	0.261
36	JKT4	Floodplain	27	JKT4F	JKT4F-27	SHRUB	RUUR	1.5	0.261
36	JKT4	Floodplain	28	JKT4F	JKT4F-28	SHRUB	RUUR	1.5	0.261
36	JKT4	Floodplain	29	JKT4F	JKT4F-29	SHRUB	RUUR	1.5	0.261
36	JKT4	Floodplain	3	JKT4F	JKT4F-3	SHRUB	RUDI	3	0.522
36	JKT4	Floodplain	30	JKT4F	JKT4F-30	SHRUB	RUUR	1.5	0.261
36	JKT4	Floodplain	31	JKT4F	JKT4F-31	TREE	SALA	9.144	21.598
36	JKT4	Floodplain	32	JKT4F	JKT4F-32	TREE	SALU	27.432	297.275
36	JKT4	Floodplain	33	JKT4F	JKT4F-33	TREE	SALU	33.528	479.91
36	JKT4	Floodplain	34	JKT4F	JKT4F-34	TREE	SALU	15.24	73.0971
36	JKT4	Floodplain	4	JKT4F	JKT4F-4	SHRUB	RUDI	3	0.522
36	JKT4	Floodplain	5	JKT4F	JKT4F-5	SHRUB	RUDI	3	0.522
36	JKT4	Floodplain	6	JKT4F	JKT4F-6	SHRUB	RUDI	3	0.522
36	JKT4	Floodplain	7	JKT4F	JKT4F-7	SHRUB	RUDI	3	0.522
36	JKT4	Floodplain	8	JKT4F	JKT4F-8	SHRUB	RUDI	3	0.522
36	JKT4	Floodplain	9	JKT4F	JKT4F-9	SHRUB	RUDI	3	0.522
27	KEN1	Floodplain	0	KEN1F	KEN1F-0
0	LAM1	Floodplain	0	LAM1F	LAM1F-0
37	LCV1	Floodplain	1	LCV1F	LCV1F-1	SHRUB	RUDI	3	0.522
37	LCV1	Floodplain	10	LCV1F	LCV1F-10	SHRUB	RUDI	3	0.522
37	LCV1	Floodplain	11	LCV1F	LCV1F-11	SHRUB	RUDI	3	0.522
37	LCV1	Floodplain	12	LCV1F	LCV1F-12	SHRUB	RUDI	3	0.522
37	LCV1	Floodplain	13	LCV1F	LCV1F-13	SHRUB	RUDI	3	0.522
37	LCV1	Floodplain	14	LCV1F	LCV1F-14	SHRUB	RUDI	3	0.522
37	LCV1	Floodplain	15	LCV1F	LCV1F-15	SHRUB	RUDI	3	0.522
37	LCV1	Floodplain	16	LCV1F	LCV1F-16	SHRUB	RUDI	1.5	0.261
37	LCV1	Floodplain	17	LCV1F	LCV1F-17	SHRUB	RUDI	1.5	0.261
37	LCV1	Floodplain	18	LCV1F	LCV1F-18	SHRUB	RUDI	1.5	0.261
37	LCV1	Floodplain	19	LCV1F	LCV1F-19	SHRUB	RUDI	1.5	0.261
37	LCV1	Floodplain	2	LCV1F	LCV1F-2	SHRUB	RUDI	3	0.522
37	LCV1	Floodplain	20	LCV1F	LCV1F-20	SHRUB	RUDI	1.5	0.261
37	LCV1	Floodplain	21	LCV1F	LCV1F-21	SHRUB	RUDI	1.5	0.261
37	LCV1	Floodplain	22	LCV1F	LCV1F-22	SHRUB	RUDI	1.5	0.261
37	LCV1	Floodplain	3	LCV1F	LCV1F-3	SHRUB	RUDI	3	0.522
37	LCV1	Floodplain	4	LCV1F	LCV1F-4	SHRUB	RUDI	3	0.522
37	LCV1	Floodplain	5	LCV1F	LCV1F-5	SHRUB	RUDI	3	0.522
37	LCV1	Floodplain	6	LCV1F	LCV1F-6	SHRUB	RUDI	3	0.522
37	LCV1	Floodplain	7	LCV1F	LCV1F-7	SHRUB	RUDI	3	0.522
37	LCV1	Floodplain	8	LCV1F	LCV1F-8	SHRUB	RUDI	3	0.522
37	LCV1	Floodplain	9	LCV1F	LCV1F-9	SHRUB	RUDI	3	0.522
11	LCV2	Floodplain	1	LCV2F	LCV2F-1	SHRUB	RUDI	3	0.522
11	LCV2	Floodplain	2	LCV2F	LCV2F-2	SHRUB	RUDI	1.5	0.261
11	LCV2	Floodplain	3	LCV2F	LCV2F-3	SHRUB	RUDI	1.5	0.261
11	LCV2	Floodplain	4	LCV2F	LCV2F-4	TREE	SALA	9.144	21.598
11	LCV2	Floodplain	5	LCV2F	LCV2F-5	TREE	SALA	6.096	8.2061
12	MCS1	Floodplain	1	MCS1F	MCS1F-1	SHRUB	RUDI	3	0.522
12	MCS1	Floodplain	10	MCS1F	MCS1F-10	TREE	SALA	12.192	42.9146
12	MCS1	Floodplain	11	MCS1F	MCS1F-11	TREE	SALA	6.096	8.2061
12	MCS1	Floodplain	12	MCS1F	MCS1F-12	TREE	SALA	9.144	21.598
12	MCS1	Floodplain	2	MCS1F	MCS1F-2	SHRUB	RUDI	3	0.522
12	MCS1	Floodplain	3	MCS1F	MCS1F-3	SHRUB	RUDI	3	0.522
12	MCS1	Floodplain	4	MCS1F	MCS1F-4	SHRUB	RUDI	3	0.522
12	MCS1	Floodplain	5	MCS1F	MCS1F-5	SHRUB	RUDI	3	0.522
12	MCS1	Floodplain	6	MCS1F	MCS1F-6	SHRUB	RUDI	3	0.522
12	MCS1	Floodplain	7	MCS1F	MCS1F-7	SHRUB	RUDI	3	0.522
12	MCS1	Floodplain	8	MCS1F	MCS1F-8	TREE	SAEX	12.192	42.9146
12	MCS1	Floodplain	9	MCS1F	MCS1F-9	TREE	SAEX	6.1	8.21895
12	MCS2	Floodplain	1	MCS2F	MCS2F-1	SHRUB	RUDI	3	0.522
12	MCS2	Floodplain	10	MCS2F	MCS2F-10	SHRUB	RUDI	1.5	0.261
12	MCS2	Floodplain	11	MCS2F	MCS2F-11	TREE	ALRH	18.288	112.949
12	MCS2	Floodplain	12	MCS2F	MCS2F-12	TREE	ALRH	12.192	42.9146
12	MCS2	Floodplain	13	MCS2F	MCS2F-13	TREE	ALRH	6.096	8.2061
12	MCS2	Floodplain	14	MCS2F	MCS2F-14	TREE	SALA	15.24	73.0971
12	MCS2	Floodplain	15	MCS2F	MCS2F-15	TREE	SALA	9.144	21.598
12	MCS2	Floodplain	2	MCS2F	MCS2F-2	SHRUB	RUDI	3	0.522
12	MCS2	Floodplain	3	MCS2F	MCS2F-3	SHRUB	RUDI	3	0.522
12	MCS2	Floodplain	4	MCS2F	MCS2F-4	SHRUB	RUDI	3	0.522
12	MCS2	Floodplain	5	MCS2F	MCS2F-5	SHRUB	RUDI	3	0.522
12	MCS2	Floodplain	6	MCS2F	MCS2F-6	SHRUB	RUDI	1.5	0.261
12	MCS2	Floodplain	7	MCS2F	MCS2F-7	SHRUB	RUDI	1.5	0.261
12	MCS2	Floodplain	8	MCS2F	MCS2F-8	SHRUB	RUDI	1.5	0.261
12	MCS2	Floodplain	9	MCS2F	MCS2F-9	SHRUB	RUDI	1.5	0.261
0	MM1	Floodplain	0	MM1F	MM1F-0
0	MM2	Floodplain	1	MM2F	MM2F-1	SHRUB	RUUR	1.5	0.261
0	MM2	Floodplain	10	MM2F	MM2F-10	SHRUB	RUUR	1.5	0.261
0	MM2	Floodplain	2	MM2F	MM2F-2	SHRUB	RUUR	1.5	0.261
0	MM2	Floodplain	3	MM2F	MM2F-3	SHRUB	RUUR	1.5	0.261
0	MM2	Floodplain	4	MM2F	MM2F-4	SHRUB	RUUR	1.5	0.261
0	MM2	Floodplain	5	MM2F	MM2F-5	SHRUB	RUUR	1.5	0.261
0	MM2	Floodplain	6	MM2F	MM2F-6	SHRUB	RUUR	1.5	0.261
0	MM2	Floodplain	7	MM2F	MM2F-7	SHRUB	RUUR	1.5	0.261
0	MM2	Floodplain	8	MM2F	MM2F-8	SHRUB	RUUR	1.5	0.261
0	MM2	Floodplain	9	MM2F	MM2F-9	SHRUB	RUUR	1.5	0.261
9	Murphy1	Floodplain	1	Murphy1F	Murphy1F-1	TREE	SALA	12.192	42.9146
9	Murphy1	Floodplain	2	Murphy1F	Murphy1F-2	TREE	SALA	9.144	21.598
9	Murphy1	Floodplain	3	Murphy1F	Murphy1F-3	TREE	SALA	9.144	21.598
9	Murphy1	Floodplain	4	Murphy1F	Murphy1F-4	TREE	SALA	6.096	8.2061
0	Murphy2	Floodplain	0	Murphy2F	Murphy2F-0
0	Murphy3	Floodplain	0	Murphy3F	Murphy3F-0
7	Murphy4	Floodplain	1	Murphy4F	Murphy4F-1	TREE	SALA	15.24	73.0971
7	Murphy4	Floodplain	2	Murphy4F	Murphy4F-2	TREE	SALA	9.144	21.598
7	Murphy4	Floodplain	3	Murphy4F	Murphy4F-3	TREE	SALA	6.096	8.2061
30	OASP1	Floodplain	1	OASP1F	OASP1F-1	SHRUB	RUDI	3	0.522
30	OASP1	Floodplain	10	OASP1F	OASP1F-10	SHRUB	RUDI	1.5	0.261
30	OASP1	Floodplain	11	OASP1F	OASP1F-11	TREE	SALA	3.048	1.56916
30	OASP1	Floodplain	12	OASP1F	OASP1F-12	TREE	SALA	6.096	8.2061
30	OASP1	Floodplain	2	OASP1F	OASP1F-2	SHRUB	RUDI	3	0.522
30	OASP1	Floodplain	3	OASP1F	OASP1F-3	SHRUB	RUDI	3	0.522
30	OASP1	Floodplain	4	OASP1F	OASP1F-4	SHRUB	RUDI	3	0.522
30	OASP1	Floodplain	5	OASP1F	OASP1F-5	SHRUB	RUDI	3	0.522
30	OASP1	Floodplain	6	OASP1F	OASP1F-6	SHRUB	RUDI	1.5	0.261
30	OASP1	Floodplain	7	OASP1F	OASP1F-7	SHRUB	RUDI	1.5	0.261
30	OASP1	Floodplain	8	OASP1F	OASP1F-8	SHRUB	RUDI	1.5	0.261
30	OASP1	Floodplain	9	OASP1F	OASP1F-9	SHRUB	RUDI	1.5	0.261
16	PMN1	Floodplain	1	PMN1F	PMN1F-1	TREE	SALA	33.528	479.91
16	PMN1	Floodplain	2	PMN1F	PMN1F-2	TREE	SALA	27.432	297.275
16	PMN1	Floodplain	3	PMN1F	PMN1F-3	TREE	SALA	18.288	112.949
0	PMN2	Floodplain	0	PMN2F	PMN2F-0
28	RJG1	Floodplain	1	RJG1F	RJG1F-1	SHRUB	RUUR	1.5	0.261
28	RJG1	Floodplain	10	RJG1F	RJG1F-10	SHRUB	RUUR	1.5	0.261
28	RJG1	Floodplain	11	RJG1F	RJG1F-11	SHRUB	RUUR	1.5	0.261
28	RJG1	Floodplain	12	RJG1F	RJG1F-12	SHRUB	RUUR	1.5	0.261
28	RJG1	Floodplain	13	RJG1F	RJG1F-13	SHRUB	RUUR	1.5	0.261
28	RJG1	Floodplain	14	RJG1F	RJG1F-14	SHRUB	RUUR	1.5	0.261
28	RJG1	Floodplain	15	RJG1F	RJG1F-15	SHRUB	RUUR	1.5	0.261
39	RJG1	Floodplain	16	RJG1F	RJG1F-16	TREE	SALA	6.096	8.2061
39	RJG1	Floodplain	17	RJG1F	RJG1F-17	TREE	SALA	9.144	21.598
39	RJG1	Floodplain	18	RJG1F	RJG1F-18	TREE	SALA	15.24	73.0971
28	RJG1	Floodplain	2	RJG1F	RJG1F-2	SHRUB	RUUR	1.5	0.261
28	RJG1	Floodplain	3	RJG1F	RJG1F-3	SHRUB	RUUR	1.5	0.261
28	RJG1	Floodplain	4	RJG1F	RJG1F-4	SHRUB	RUUR	1.5	0.261
28	RJG1	Floodplain	5	RJG1F	RJG1F-5	SHRUB	RUUR	1.5	0.261
28	RJG1	Floodplain	6	RJG1F	RJG1F-6	SHRUB	RUUR	1.5	0.261
28	RJG1	Floodplain	7	RJG1F	RJG1F-7	SHRUB	RUUR	1.5	0.261
28	RJG1	Floodplain	8	RJG1F	RJG1F-8	SHRUB	RUUR	1.5	0.261
28	RJG1	Floodplain	9	RJG1F	RJG1F-9	SHRUB	RUUR	1.5	0.261
28	RJG2	Floodplain	1	RJG2F	RJG2F-1	SHRUB	RUUR	1.5	0.261
28	RJG2	Floodplain	10	RJG2F	RJG2F-10	SHRUB	RUUR	1.5	0.261
28	RJG2	Floodplain	11	RJG2F	RJG2F-11	SHRUB	RUUR	1.5	0.261
28	RJG2	Floodplain	12	RJG2F	RJG2F-12	SHRUB	RUUR	1.5	0.261
28	RJG2	Floodplain	13	RJG2F	RJG2F-13	SHRUB	RUUR	1.5	0.261
28	RJG2	Floodplain	14	RJG2F	RJG2F-14	SHRUB	RUUR	1.5	0.261
28	RJG2	Floodplain	15	RJG2F	RJG2F-15	SHRUB	RUUR	1.5	0.261
28	RJG2	Floodplain	16	RJG2F	RJG2F-16	SHRUB	RUUR	1.5	0.261
28	RJG2	Floodplain	17	RJG2F	RJG2F-17	SHRUB	RUUR	1.5	0.261
28	RJG2	Floodplain	18	RJG2F	RJG2F-18	SHRUB	RUUR	1.5	0.261
28	RJG2	Floodplain	19	RJG2F	RJG2F-19	SHRUB	RUUR	1.5	0.261
28	RJG2	Floodplain	2	RJG2F	RJG2F-2	SHRUB	RUUR	1.5	0.261
28	RJG2	Floodplain	20	RJG2F	RJG2F-20	SHRUB	RUUR	1.5	0.261
28	RJG2	Floodplain	21	RJG2F	RJG2F-21	SHRUB	RUUR	1.5	0.261
28	RJG2	Floodplain	22	RJG2F	RJG2F-22	SHRUB	RUUR	1.5	0.261
28	RJG2	Floodplain	23	RJG2F	RJG2F-23	SHRUB	RUUR	1.5	0.261
28	RJG2	Floodplain	24	RJG2F	RJG2F-24	SHRUB	RUUR	1.5	0.261
28	RJG2	Floodplain	25	RJG2F	RJG2F-25	SHRUB	RUUR	1.5	0.261
28	RJG2	Floodplain	26	RJG2F	RJG2F-26	TREE	DEAD	15.24	39.4724
28	RJG2	Floodplain	27	RJG2F	RJG2F-27	TREE	SALA	6.096	8.2061
28	RJG2	Floodplain	28	RJG2F	RJG2F-28	TREE	SALA	9.144	21.598
28	RJG2	Floodplain	29	RJG2F	RJG2F-29	TREE	SALA	18.288	112.949
28	RJG2	Floodplain	3	RJG2F	RJG2F-3	SHRUB	RUUR	1.5	0.261
28	RJG2	Floodplain	4	RJG2F	RJG2F-4	SHRUB	RUUR	1.5	0.261
28	RJG2	Floodplain	5	RJG2F	RJG2F-5	SHRUB	RUUR	1.5	0.261
28	RJG2	Floodplain	6	RJG2F	RJG2F-6	SHRUB	RUUR	1.5	0.261
28	RJG2	Floodplain	7	RJG2F	RJG2F-7	SHRUB	RUUR	1.5	0.261
28	RJG2	Floodplain	8	RJG2F	RJG2F-8	SHRUB	RUUR	1.5	0.261
28	RJG2	Floodplain	9	RJG2F	RJG2F-9	SHRUB	RUUR	1.5	0.261
9	SANG1	Floodplain	0	SANG1F	SANG1F-0
15	SMG1	Floodplain	1	SMG1F	SMG1F-1	SHRUB	RUDI	3	0.522
15	SMG1	Floodplain	2	SMG1F	SMG1F-2	SHRUB	RUDI	3	0.522
15	SMG1	Floodplain	3	SMG1F	SMG1F-3	SHRUB	RUDI	3	0.522
15	SMG1	Floodplain	4	SMG1F	SMG1F-4	SHRUB	RUDI	3	0.522
15	SMG1	Floodplain	5	SMG1F	SMG1F-5	SHRUB	RUDI	3	0.522
15	SMG1	Floodplain	6	SMG1F	SMG1F-6	TREE	SALA	18.288	112.949
15	SMG1	Floodplain	7	SMG1F	SMG1F-7	TREE	SALA	6.096	8.2061
15	SMG1	Floodplain	8	SMG1F	SMG1F-8	TREE	SALA	12.192	42.9146
45	SSU1	Floodplain	1	SSU1F	SSU1F-1	SHRUB	RUDI	1.5	0.261
45	SSU1	Floodplain	10	SSU1F	SSU1F-10	SHRUB	RUDI	3	0.522
45	SSU1	Floodplain	11	SSU1F	SSU1F-11	SHRUB	RUDI	3	0.522
45	SSU1	Floodplain	12	SSU1F	SSU1F-12	SHRUB	RUDI	3	0.522
45	SSU1	Floodplain	13	SSU1F	SSU1F-13	SHRUB	RUDI	3	0.522
45	SSU1	Floodplain	14	SSU1F	SSU1F-14	SHRUB	RUDI	3	0.522
45	SSU1	Floodplain	15	SSU1F	SSU1F-15	SHRUB	RUDI	3	0.522
45	SSU1	Floodplain	16	SSU1F	SSU1F-16	SHRUB	RUDI	3	0.522
45	SSU1	Floodplain	17	SSU1F	SSU1F-17	TREE	SALA	15.24	73.0971
45	SSU1	Floodplain	18	SSU1F	SSU1F-18	TREE	SALA	6.096	8.2061
45	SSU1	Floodplain	19	SSU1F	SSU1F-19	TREE	SALA	9.144	21.598
45	SSU1	Floodplain	2	SSU1F	SSU1F-2	SHRUB	RUDI	1.5	0.261
45	SSU1	Floodplain	3	SSU1F	SSU1F-3	SHRUB	RUDI	1.5	0.261
45	SSU1	Floodplain	4	SSU1F	SSU1F-4	SHRUB	RUDI	1.5	0.261
45	SSU1	Floodplain	5	SSU1F	SSU1F-5	SHRUB	RUDI	1.5	0.261
45	SSU1	Floodplain	6	SSU1F	SSU1F-6	SHRUB	RUDI	1.5	0.261
45	SSU1	Floodplain	7	SSU1F	SSU1F-7	SHRUB	RUDI	1.5	0.261
45	SSU1	Floodplain	8	SSU1F	SSU1F-8	SHRUB	RUDI	1.5	0.261
45	SSU1	Floodplain	9	SSU1F	SSU1F-9	SHRUB	RUDI	3	0.522
1	TCR1	Floodplain	0	TCR1F	TCR1F-0
41	USCG1	Floodplain	1	USCG1F	USCG1F-1	TREE	DEAD	15.24	39.4724
41	USCG1	Floodplain	2	USCG1F	USCG1F-2	TREE	SALA	39.624	715.018
41	USCG1	Floodplain	3	USCG1F	USCG1F-3	TREE	SALA	27.432	297.275
0	WCR1	Floodplain	0	WCR1F	WCR1F-0
23	WCR2	Floodplain	1	WCR2F	WCR2F-1	SHRUB	RUUR	1.5	0.261
23	WCR2	Floodplain	10	WCR2F	WCR2F-10	SHRUB	RUUR	1.5	0.261
23	WCR2	Floodplain	11	WCR2F	WCR2F-11	SHRUB	RUUR	1.5	0.261
23	WCR2	Floodplain	12	WCR2F	WCR2F-12	SHRUB	RUUR	1.5	0.261
23	WCR2	Floodplain	13	WCR2F	WCR2F-13	SHRUB	RUUR	1.5	0.261
23	WCR2	Floodplain	14	WCR2F	WCR2F-14	SHRUB	RUUR	1.5	0.261
23	WCR2	Floodplain	15	WCR2F	WCR2F-15	SHRUB	RUUR	1.5	0.261
23	WCR2	Floodplain	16	WCR2F	WCR2F-16	SHRUB	RUUR	1.5	0.261
23	WCR2	Floodplain	17	WCR2F	WCR2F-17	SHRUB	RUUR	1.5	0.261
23	WCR2	Floodplain	18	WCR2F	WCR2F-18	SHRUB	RUUR	1.5	0.261
23	WCR2	Floodplain	19	WCR2F	WCR2F-19	SHRUB	RUUR	1.5	0.261
23	WCR2	Floodplain	2	WCR2F	WCR2F-2	SHRUB	RUUR	1.5	0.261
23	WCR2	Floodplain	20	WCR2F	WCR2F-20	SHRUB	RUUR	1.5	0.261
23	WCR2	Floodplain	21	WCR2F	WCR2F-21	SHRUB	RUUR	1.5	0.261
23	WCR2	Floodplain	22	WCR2F	WCR2F-22	SHRUB	RUUR	1.5	0.261
23	WCR2	Floodplain	23	WCR2F	WCR2F-23	SHRUB	RUUR	1.5	0.261
23	WCR2	Floodplain	24	WCR2F	WCR2F-24	SHRUB	RUUR	1.5	0.261
23	WCR2	Floodplain	25	WCR2F	WCR2F-25	SHRUB	RUUR	1.5	0.261
23	WCR2	Floodplain	26	WCR2F	WCR2F-26	SHRUB	RUUR	1.5	0.261
23	WCR2	Floodplain	27	WCR2F	WCR2F-27	SHRUB	RUUR	1.5	0.261
23	WCR2	Floodplain	28	WCR2F	WCR2F-28	SHRUB	RUUR	1.5	0.261
23	WCR2	Floodplain	29	WCR2F	WCR2F-29	SHRUB	RUUR	1.5	0.261
23	WCR2	Floodplain	3	WCR2F	WCR2F-3	SHRUB	RUUR	1.5	0.261
23	WCR2	Floodplain	30	WCR2F	WCR2F-30	SHRUB	RUUR	1.5	0.261
23	WCR2	Floodplain	31	WCR2F	WCR2F-31	TREE	ALRH	21.336	163.179
23	WCR2	Floodplain	32	WCR2F	WCR2F-32	TREE	ALRH	9.144	21.598
23	WCR2	Floodplain	33	WCR2F	WCR2F-33	TREE	ALRH	18.288	112.949
23	WCR2	Floodplain	34	WCR2F	WCR2F-34	TREE	SALA	12.192	42.9146
23	WCR2	Floodplain	35	WCR2F	WCR2F-35	TREE	SALA	9.144	21.598
23	WCR2	Floodplain	4	WCR2F	WCR2F-4	SHRUB	RUUR	1.5	0.261
23	WCR2	Floodplain	5	WCR2F	WCR2F-5	SHRUB	RUUR	1.5	0.261
23	WCR2	Floodplain	6	WCR2F	WCR2F-6	SHRUB	RUUR	1.5	0.261
23	WCR2	Floodplain	7	WCR2F	WCR2F-7	SHRUB	RUUR	1.5	0.261
23	WCR2	Floodplain	8	WCR2F	WCR2F-8	SHRUB	RUUR	1.5	0.261
23	WCR2	Floodplain	9	WCR2F	WCR2F-9	SHRUB	RUUR	1.5	0.261
21	WCR3	Floodplain	1	WCR3F	WCR3F-1	SHRUB	RUUR	1.5	0.261
21	WCR3	Floodplain	10	WCR3F	WCR3F-10	SHRUB	RUUR	1.5	0.261
21	WCR3	Floodplain	11	WCR3F	WCR3F-11	SHRUB	RUUR	1.5	0.261
21	WCR3	Floodplain	12	WCR3F	WCR3F-12	SHRUB	RUUR	1.5	0.261
21	WCR3	Floodplain	13	WCR3F	WCR3F-13	SHRUB	RUUR	1.5	0.261
21	WCR3	Floodplain	14	WCR3F	WCR3F-14	SHRUB	RUUR	1.5	0.261
21	WCR3	Floodplain	15	WCR3F	WCR3F-15	SHRUB	RUUR	1.5	0.261
21	WCR3	Floodplain	16	WCR3F	WCR3F-16	SHRUB	RUUR	1.5	0.261
21	WCR3	Floodplain	17	WCR3F	WCR3F-17	SHRUB	RUUR	1.5	0.261
21	WCR3	Floodplain	18	WCR3F	WCR3F-18	SHRUB	RUUR	1.5	0.261
21	WCR3	Floodplain	19	WCR3F	WCR3F-19	SHRUB	RUUR	1.5	0.261
21	WCR3	Floodplain	2	WCR3F	WCR3F-2	SHRUB	RUUR	1.5	0.261
21	WCR3	Floodplain	20	WCR3F	WCR3F-20	SHRUB	RUUR	1.5	0.261
21	WCR3	Floodplain	21	WCR3F	WCR3F-21	TREE	ALRH	12.192	42.9146
21	WCR3	Floodplain	22	WCR3F	WCR3F-22	TREE	ALRH	21.336	163.179
21	WCR3	Floodplain	3	WCR3F	WCR3F-3	SHRUB	RUUR	1.5	0.261
21	WCR3	Floodplain	4	WCR3F	WCR3F-4	SHRUB	RUUR	1.5	0.261
21	WCR3	Floodplain	5	WCR3F	WCR3F-5	SHRUB	RUUR	1.5	0.261
21	WCR3	Floodplain	6	WCR3F	WCR3F-6	SHRUB	RUUR	1.5	0.261
21	WCR3	Floodplain	7	WCR3F	WCR3F-7	SHRUB	RUUR	1.5	0.261
21	WCR3	Floodplain	8	WCR3F	WCR3F-8	SHRUB	RUUR	1.5	0.261
21	WCR3	Floodplain	9	WCR3F	WCR3F-9	SHRUB	RUUR	1.5	0.261
24	WCR4	Floodplain	1	WCR4F	WCR4F-1	SHRUB	RUUR	1.5	0.261
24	WCR4	Floodplain	10	WCR4F	WCR4F-10	SHRUB	RUUR	1.5	0.261
24	WCR4	Floodplain	11	WCR4F	WCR4F-11	SHRUB	RUUR	1.5	0.261
24	WCR4	Floodplain	12	WCR4F	WCR4F-12	SHRUB	RUUR	1.5	0.261
24	WCR4	Floodplain	13	WCR4F	WCR4F-13	SHRUB	RUUR	1.5	0.261
24	WCR4	Floodplain	14	WCR4F	WCR4F-14	SHRUB	RUUR	1.5	0.261
24	WCR4	Floodplain	15	WCR4F	WCR4F-15	SHRUB	RUUR	1.5	0.261
24	WCR4	Floodplain	16	WCR4F	WCR4F-16	SHRUB	RUUR	1.5	0.261
24	WCR4	Floodplain	17	WCR4F	WCR4F-17	SHRUB	RUUR	1.5	0.261
24	WCR4	Floodplain	18	WCR4F	WCR4F-18	SHRUB	RUUR	1.5	0.261
24	WCR4	Floodplain	19	WCR4F	WCR4F-19	SHRUB	RUUR	1.5	0.261
24	WCR4	Floodplain	2	WCR4F	WCR4F-2	SHRUB	RUUR	1.5	0.261
24	WCR4	Floodplain	20	WCR4F	WCR4F-20	SHRUB	RUUR	1.5	0.261
24	WCR4	Floodplain	21	WCR4F	WCR4F-21	TREE	ALRH	12.192	42.9146
24	WCR4	Floodplain	22	WCR4F	WCR4F-22	TREE	ALRH	12.192	42.9146
24	WCR4	Floodplain	23	WCR4F	WCR4F-23	TREE	ALRH	24.384	224.426
24	WCR4	Floodplain	24	WCR4F	WCR4F-24	TREE	ALRH	18.288	112.949
24	WCR4	Floodplain	3	WCR4F	WCR4F-3	SHRUB	RUUR	1.5	0.261
24	WCR4	Floodplain	4	WCR4F	WCR4F-4	SHRUB	RUUR	1.5	0.261
24	WCR4	Floodplain	5	WCR4F	WCR4F-5	SHRUB	RUUR	1.5	0.261
24	WCR4	Floodplain	6	WCR4F	WCR4F-6	SHRUB	RUUR	1.5	0.261
24	WCR4	Floodplain	7	WCR4F	WCR4F-7	SHRUB	RUUR	1.5	0.261
24	WCR4	Floodplain	8	WCR4F	WCR4F-8	SHRUB	RUUR	1.5	0.261
24	WCR4	Floodplain	9	WCR4F	WCR4F-9	SHRUB	RUUR	1.5	0.261
3	XYZ1	Floodplain	0	XYZ1F	XYZ1F-0
26	ALP1	Upper bank	1	ALP1U	ALP1U-1	TREE	SALA	9.144	21.598
26	ALP1	Upper bank	2	ALP1U	ALP1U-2	TREE	SALA	6.096	8.2061
3	ALP2	Upper bank	0	ALP2U	ALP2U-0
17	ALP3	Upper bank	0	ALP3U	ALP3U-0
16	ALP4	Upper bank	1	ALP4U	ALP4U-1	TREE	SALA	9.144	21.598
6	BLOOM1	Upper bank	0	BLOOM1U	BLOOM1U-0
0	BLOOM2	Upper bank	0	BLOOM2U	BLOOM2U-0
21	DRG1	Upper bank	0	DRG1U	DRG1U-0
0	DRG2	Upper bank	0	DRG2U	DRG2U-0
9	EDG1	Upper bank	0	EDG1U	EDG1U-0
33	FCV1	Upper bank	1	FCV1U	FCV1U-1	SHRUB	RUDI	3	0.522
33	FCV1	Upper bank	10	FCV1U	FCV1U-10	SHRUB	RUDI	1.5	0.261
33	FCV1	Upper bank	11	FCV1U	FCV1U-11	SHRUB	RUDI	1.5	0.261
33	FCV1	Upper bank	12	FCV1U	FCV1U-12	SHRUB	RUDI	1.5	0.261
33	FCV1	Upper bank	13	FCV1U	FCV1U-13	SHRUB	RUDI	1.5	0.261
33	FCV1	Upper bank	14	FCV1U	FCV1U-14	SHRUB	RUDI	1.5	0.261
33	FCV1	Upper bank	15	FCV1U	FCV1U-15	TREE	SALA	27.432	297.275
33	FCV1	Upper bank	16	FCV1U	FCV1U-16	TREE	SALA	6.096	8.2061
33	FCV1	Upper bank	2	FCV1U	FCV1U-2	SHRUB	RUDI	3	0.522
33	FCV1	Upper bank	3	FCV1U	FCV1U-3	SHRUB	RUDI	3	0.522
33	FCV1	Upper bank	4	FCV1U	FCV1U-4	SHRUB	RUDI	3	0.522
33	FCV1	Upper bank	5	FCV1U	FCV1U-5	SHRUB	RUDI	3	0.522
33	FCV1	Upper bank	6	FCV1U	FCV1U-6	SHRUB	RUDI	3	0.522
33	FCV1	Upper bank	7	FCV1U	FCV1U-7	SHRUB	RUDI	3	0.522
33	FCV1	Upper bank	8	FCV1U	FCV1U-8	SHRUB	RUDI	3	0.522
33	FCV1	Upper bank	9	FCV1U	FCV1U-9	SHRUB	RUDI	1.5	0.261
0	JKR1	Upper bank	0	JKR1U	JKR1U-0
13	JKT1	Upper bank	1	JKT1U	JKT1U-1	SHRUB	RUUR	1.5	0.261
13	JKT1	Upper bank	2	JKT1U	JKT1U-2	SHRUB	RUUR	1.5	0.261
13	JKT1	Upper bank	3	JKT1U	JKT1U-3	SHRUB	RUUR	1.5	0.261
13	JKT1	Upper bank	4	JKT1U	JKT1U-4	TREE	SALA	9.144	21.598
14	JKT2	Upper bank	1	JKT2U	JKT2U-1	TREE	SALA	6.096	8.2061
14	JKT2	Upper bank	2	JKT2U	JKT2U-2	TREE	SALA	12.2	42.9818
2	JKT3	Upper bank	0	JKT3U	JKT3U-0
36	JKT4	Upper bank	1	JKT4U	JKT4U-1	SHRUB	RUDI	3	0.522
36	JKT4	Upper bank	10	JKT4U	JKT4U-10	SHRUB	RUDI	3	0.522
36	JKT4	Upper bank	11	JKT4U	JKT4U-11	SHRUB	RUUR	1.5	0.261
36	JKT4	Upper bank	12	JKT4U	JKT4U-12	SHRUB	RUUR	1.5	0.261
36	JKT4	Upper bank	13	JKT4U	JKT4U-13	SHRUB	RUUR	1.5	0.261
36	JKT4	Upper bank	14	JKT4U	JKT4U-14	SHRUB	RUUR	1.5	0.261
36	JKT4	Upper bank	15	JKT4U	JKT4U-15	SHRUB	RUUR	1.5	0.261
36	JKT4	Upper bank	16	JKT4U	JKT4U-16	SHRUB	RUUR	1.5	0.261
36	JKT4	Upper bank	17	JKT4U	JKT4U-17	SHRUB	RUUR	1.5	0.261
36	JKT4	Upper bank	18	JKT4U	JKT4U-18	SHRUB	RUUR	1.5	0.261
36	JKT4	Upper bank	19	JKT4U	JKT4U-19	SHRUB	RUUR	1.5	0.261
36	JKT4	Upper bank	2	JKT4U	JKT4U-2	SHRUB	RUDI	3	0.522
36	JKT4	Upper bank	20	JKT4U	JKT4U-20	SHRUB	RUUR	1.5	0.261
36	JKT4	Upper bank	21	JKT4U	JKT4U-21	SHRUB	RUUR	1.5	0.261
36	JKT4	Upper bank	22	JKT4U	JKT4U-22	SHRUB	RUUR	1.5	0.261
36	JKT4	Upper bank	23	JKT4U	JKT4U-23	SHRUB	RUUR	1.5	0.261
36	JKT4	Upper bank	24	JKT4U	JKT4U-24	SHRUB	RUUR	1.5	0.261
36	JKT4	Upper bank	25	JKT4U	JKT4U-25	SHRUB	RUUR	1.5	0.261
36	JKT4	Upper bank	26	JKT4U	JKT4U-26	SHRUB	RUUR	1.5	0.261
36	JKT4	Upper bank	27	JKT4U	JKT4U-27	SHRUB	RUUR	1.5	0.261
36	JKT4	Upper bank	28	JKT4U	JKT4U-28	SHRUB	RUUR	1.5	0.261
36	JKT4	Upper bank	29	JKT4U	JKT4U-29	SHRUB	RUUR	1.5	0.261
36	JKT4	Upper bank	3	JKT4U	JKT4U-3	SHRUB	RUDI	3	0.522
36	JKT4	Upper bank	30	JKT4U	JKT4U-30	SHRUB	RUUR	1.5	0.261
36	JKT4	Upper bank	31	JKT4U	JKT4U-31	TREE	SALA	21.336	163.179
36	JKT4	Upper bank	32	JKT4U	JKT4U-32	TREE	SALA	6.096	8.2061
36	JKT4	Upper bank	4	JKT4U	JKT4U-4	SHRUB	RUDI	3	0.522
36	JKT4	Upper bank	5	JKT4U	JKT4U-5	SHRUB	RUDI	3	0.522
36	JKT4	Upper bank	6	JKT4U	JKT4U-6	SHRUB	RUDI	3	0.522
36	JKT4	Upper bank	7	JKT4U	JKT4U-7	SHRUB	RUDI	3	0.522
36	JKT4	Upper bank	8	JKT4U	JKT4U-8	SHRUB	RUDI	3	0.522
36	JKT4	Upper bank	9	JKT4U	JKT4U-9	SHRUB	RUDI	3	0.522
27	KEN1	Upper bank	0	KEN1U	KEN1U-0
0	LAM1	Upper bank	0	LAM1U	LAM1U-0
37	LCV1	Upper bank	1	LCV1U	LCV1U-1	TREE	SALA	3.048	1.56916
37	LCV1	Upper bank	2	LCV1U	LCV1U-2	TREE	SALA	21.336	163.179
37	LCV1	Upper bank	3	LCV1U	LCV1U-3	TREE	SALA	9.144	21.598
11	LCV2	Upper bank	1	LCV2U	LCV2U-1	SHRUB	BAPI	6.096	10.623
11	LCV2	Upper bank	2	LCV2U	LCV2U-2	SHRUB	BAPI	9.144	21.189
11	LCV2	Upper bank	3	LCV2U	LCV2U-3	SHRUB	BAPI	9.144	21.189
12	MCS1	Upper bank	0	MCS1U	MCS1U-0
12	MCS2	Upper bank	0	MCS2U	MCS2U-0
0	MM1	Upper bank	0	MM1U	MM1U-0
0	MM2	Upper bank	0	MM2U	MM2U-0
9	Murphy1	Upper bank	1	Murphy1U	Murphy1U-1	SHRUB	ROCA	1.5	0.261
9	Murphy1	Upper bank	10	Murphy1U	Murphy1U-10	SHRUB	ROCA	1.5	0.261
9	Murphy1	Upper bank	2	Murphy1U	Murphy1U-2	SHRUB	ROCA	1.5	0.261
9	Murphy1	Upper bank	3	Murphy1U	Murphy1U-3	SHRUB	ROCA	1.5	0.261
9	Murphy1	Upper bank	4	Murphy1U	Murphy1U-4	SHRUB	ROCA	1.5	0.261
9	Murphy1	Upper bank	5	Murphy1U	Murphy1U-5	SHRUB	ROCA	1.5	0.261
9	Murphy1	Upper bank	6	Murphy1U	Murphy1U-6	SHRUB	ROCA	1.5	0.261
9	Murphy1	Upper bank	7	Murphy1U	Murphy1U-7	SHRUB	ROCA	1.5	0.261
9	Murphy1	Upper bank	8	Murphy1U	Murphy1U-8	SHRUB	ROCA	1.5	0.261
9	Murphy1	Upper bank	9	Murphy1U	Murphy1U-9	SHRUB	ROCA	1.5	0.261
0	Murphy2	Upper bank	0	Murphy2U	Murphy2U-0
0	Murphy3	Upper bank	0	Murphy3U	Murphy3U-0
7	Murphy4	Upper bank	0	Murphy4U	Murphy4U-0
30	OASP1	Upper bank	0	OASP1U	OASP1U-0
16	PMN1	Upper bank	1	PMN1U	PMN1U-1	SHRUB	SAME	12.2	34.6222
0	PMN2	Upper bank	0	PMN2U	PMN2U-0
39	RJG1	Upper bank	0	RJG1U	RJG1U-0
28	RJG2	Upper bank	1	RJG2U	RJG2U-1	SHRUB	RUUR	1.5	0.261
28	RJG2	Upper bank	10	RJG2U	RJG2U-10	SHRUB	RUUR	1.5	0.261
28	RJG2	Upper bank	11	RJG2U	RJG2U-11	SHRUB	RUUR	1.5	0.261
28	RJG2	Upper bank	12	RJG2U	RJG2U-12	SHRUB	RUUR	1.5	0.261
28	RJG2	Upper bank	13	RJG2U	RJG2U-13	SHRUB	RUUR	1.5	0.261
28	RJG2	Upper bank	14	RJG2U	RJG2U-14	SHRUB	RUUR	1.5	0.261
28	RJG2	Upper bank	15	RJG2U	RJG2U-15	SHRUB	RUUR	1.5	0.261
28	RJG2	Upper bank	16	RJG2U	RJG2U-16	TREE	DEAD	12.192	23.1739
28	RJG2	Upper bank	17	RJG2U	RJG2U-17	TREE	SALA	12.192	42.9146
28	RJG2	Upper bank	18	RJG2U	RJG2U-18	TREE	SALA	6.096	8.2061
28	RJG2	Upper bank	2	RJG2U	RJG2U-2	SHRUB	RUUR	1.5	0.261
28	RJG2	Upper bank	3	RJG2U	RJG2U-3	SHRUB	RUUR	1.5	0.261
28	RJG2	Upper bank	4	RJG2U	RJG2U-4	SHRUB	RUUR	1.5	0.261
28	RJG2	Upper bank	5	RJG2U	RJG2U-5	SHRUB	RUUR	1.5	0.261
28	RJG2	Upper bank	6	RJG2U	RJG2U-6	SHRUB	RUUR	1.5	0.261
28	RJG2	Upper bank	7	RJG2U	RJG2U-7	SHRUB	RUUR	1.5	0.261
28	RJG2	Upper bank	8	RJG2U	RJG2U-8	SHRUB	RUUR	1.5	0.261
28	RJG2	Upper bank	9	RJG2U	RJG2U-9	SHRUB	RUUR	1.5	0.261
9	SANG1	Upper bank	0	SANG1U	SANG1U-0
15	SMG1	Upper bank	0	SMG1U	SMG1U-0
45	SSU1	Upper bank	1	SSU1U	SSU1U-1	SHRUB	RUDI	3	0.522
45	SSU1	Upper bank	10	SSU1U	SSU1U-10	SHRUB	RUDI	3	0.522
45	SSU1	Upper bank	11	SSU1U	SSU1U-11	SHRUB	RUDI	3	0.522
45	SSU1	Upper bank	12	SSU1U	SSU1U-12	SHRUB	RUDI	3	0.522
45	SSU1	Upper bank	13	SSU1U	SSU1U-13	SHRUB	RUDI	3	0.522
45	SSU1	Upper bank	14	SSU1U	SSU1U-14	SHRUB	RUDI	3	0.522
45	SSU1	Upper bank	15	SSU1U	SSU1U-15	SHRUB	RUDI	3	0.522
45	SSU1	Upper bank	16	SSU1U	SSU1U-16	SHRUB	RUDI	3	0.522
45	SSU1	Upper bank	17	SSU1U	SSU1U-17	SHRUB	RUDI	3	0.522
45	SSU1	Upper bank	18	SSU1U	SSU1U-18	TREE	SALA	21.336	163.179
45	SSU1	Upper bank	19	SSU1U	SSU1U-19	TREE	SALA	6.096	8.2061
45	SSU1	Upper bank	2	SSU1U	SSU1U-2	SHRUB	RUDI	3	0.522
45	SSU1	Upper bank	3	SSU1U	SSU1U-3	SHRUB	RUDI	3	0.522
45	SSU1	Upper bank	4	SSU1U	SSU1U-4	SHRUB	RUDI	3	0.522
45	SSU1	Upper bank	5	SSU1U	SSU1U-5	SHRUB	RUDI	3	0.522
45	SSU1	Upper bank	6	SSU1U	SSU1U-6	SHRUB	RUDI	3	0.522
45	SSU1	Upper bank	7	SSU1U	SSU1U-7	SHRUB	RUDI	3	0.522
45	SSU1	Upper bank	8	SSU1U	SSU1U-8	SHRUB	RUDI	3	0.522
45	SSU1	Upper bank	9	SSU1U	SSU1U-9	SHRUB	RUDI	3	0.522
1	TCR1	Upper bank	0	TCR1U	TCR1U-0
41	USCG1	Upper bank	1	USCG1U	USCG1U-1	SHRUB	RUDI	1.5	0.261
41	USCG1	Upper bank	10	USCG1U	USCG1U-10	SHRUB	RUDI	3.03	0.52722
41	USCG1	Upper bank	11	USCG1U	USCG1U-11	SHRUB	RUDI	3	0.522
41	USCG1	Upper bank	12	USCG1U	USCG1U-12	SHRUB	RUDI	2.97	0.51678
41	USCG1	Upper bank	13	USCG1U	USCG1U-13	SHRUB	RUDI	3.03	0.52722
41	USCG1	Upper bank	14	USCG1U	USCG1U-14	SHRUB	RUDI	3.03	0.52722
41	USCG1	Upper bank	15	USCG1U	USCG1U-15	SHRUB	RUDI	3	0.522
41	USCG1	Upper bank	16	USCG1U	USCG1U-16	SHRUB	RUDI	2.97	0.51678
41	USCG1	Upper bank	17	USCG1U	USCG1U-17	TREE	SALA	18.288	112.949
41	USCG1	Upper bank	18	USCG1U	USCG1U-18	TREE	SALA	24.384	224.426
41	USCG1	Upper bank	19	USCG1U	USCG1U-19	TREE	SALA	30.48	382.268
41	USCG1	Upper bank	2	USCG1U	USCG1U-2	SHRUB	RUDI	1.5	0.261
41	USCG1	Upper bank	20	USCG1U	USCG1U-20	TREE	SALA	6.096	8.2061
41	USCG1	Upper bank	21	USCG1U	USCG1U-21	TREE	SALA	12.192	42.9146
41	USCG1	Upper bank	3	USCG1U	USCG1U-3	SHRUB	RUDI	1.5	0.261
41	USCG1	Upper bank	4	USCG1U	USCG1U-4	SHRUB	RUDI	1.5	0.261
41	USCG1	Upper bank	5	USCG1U	USCG1U-5	SHRUB	RUDI	1.5	0.261
41	USCG1	Upper bank	6	USCG1U	USCG1U-6	SHRUB	RUDI	1.5	0.261
41	USCG1	Upper bank	7	USCG1U	USCG1U-7	SHRUB	RUDI	1.5	0.261
41	USCG1	Upper bank	8	USCG1U	USCG1U-8	SHRUB	RUDI	1.5	0.261
41	USCG1	Upper bank	9	USCG1U	USCG1U-9	SHRUB	RUDI	1.5	0.261
0	WCR1	Upper bank	0	WCR1U	WCR1U-0
23	WCR2	Upper bank	1	WCR2U	WCR2U-1	SHRUB	BAPI	6.096	10.623
23	WCR2	Upper bank	1	WCR2U	WCR2U-1	SHRUB	BAPI	6.096	10.623
23	WCR2	Upper bank	2	WCR2U	WCR2U-2	SHRUB	RUUR	1.5	0.261
23	WCR2	Upper bank	3	WCR2U	WCR2U-3	SHRUB	RUUR	1.5	0.261
23	WCR2	Upper bank	4	WCR2U	WCR2U-4	SHRUB	RUUR	1.5	0.261
23	WCR2	Upper bank	5	WCR2U	WCR2U-5	SHRUB	RUUR	1.5	0.261
23	WCR2	Upper bank	6	WCR2U	WCR2U-6	SHRUB	RUUR	1.5	0.261
21	WCR3	Upper bank	1	WCR3U	WCR3U-1	SHRUB	BAPI	9.144	21.189
21	WCR3	Upper bank	2	WCR3U	WCR3U-2	SHRUB	BAPI	9.144	21.189
24	WCR4	Upper bank	1	WCR4U	WCR4U-1	SHRUB	BAPI	9.144	21.189
24	WCR4	Upper bank	2	WCR4U	WCR4U-2	SHRUB	BAPI	9.144	21.189
24	WCR4	Upper bank	3	WCR4U	WCR4U-3	SHRUB	BAPI	9.144	21.189
24	WCR4	Upper bank	4	WCR4U	WCR4U-4	SHRUB	BAPI	3.048	3.26303
24	WCR4	Upper bank	5	WCR4U	WCR4U-5	SHRUB	BAPI	3.048	3.26303
24	WCR4	Upper bank	6	WCR4U	WCR4U-6	SHRUB	RUUR	1.5	0.261
24	WCR4	Upper bank	7	WCR4U	WCR4U-7	TREE	SALA	6.096	8.2061
24	WCR4	Upper bank	8	WCR4U	WCR4U-8	TREE	SALA	3.048	1.56916
3	XYZ1	Upper bank	1	XYZ1U	XYZ1U-1	SHRUB	RUDI	1.5	0.261
3	XYZ1	Upper bank	2	XYZ1U	XYZ1U-2	SHRUB	RUDI	1.5	0.261

## Sheet: soil C by age & success
Site	landform	soi C (kg per m2)	age	siteplot	StatusCd
ALP 1	Channel	0.621552	26	ALP1C	Success
ALP 2	Channel	1.39039	3	ALP2C	Failure
ALP 3	Channel	1.05921	17	ALP3C	Failure
ALP 4	Channel	1.1227	16	ALP4C	Success
Bloom 2	Channel	1.5105	6	Bloom2C	Failure
Bloom1	Channel	4.4705	0	Bloom1C	Unrestored
DRG 1	Channel	0.598133	21	DRG1C	Success
DRG 2	Channel	0.451162	0	DRG2C	Unrestored
EDG 1	Channel	0.573326	9	EDG1C	Success
FCV 1	Channel	0.322987	33	FCV1C	Success
JKR 1	Channel	1.48122	0	JKR1C	Unrestored
JKT 1	Channel	1.95796	13	JKT1C	Success
JKT 2	Channel	1.45919	14	JKT2C	Success
JKT 3	Channel	0.838255	2	JKT3C	Failure
JKT 4	Channel	0.756936	36	JKT4C	Failure
KEN 1	Channel	1.74021	27	KEN1C	Failure
LAM 1	Channel	0.716888	0	LAM1C	Unrestored
LCV 1	Channel	0.984702	37	LCV1C	Success
LCV 2	Channel	0.125323	11	LCV2C	Success
MCS 1	Channel	1.66805	12	MCS1C	Success
MCS 2	Channel	0.737872	12	MCS2C	Success
MMM1	Channel	0.50737	0	MMM1C	Unrestored
MMM2	Channel	0.583175	0	MMM2C	Unrestored
Murphy 3	Channel	0.949979	9	Murphy3C	Success
Murphy 4	Channel	1.24496	0	Murphy4C	Unrestored
Murphy1	Channel	1.35586	0	Murphy1C	Unrestored
Murphy2	Channel	1.64834	7	Murphy2C	Success
OASP 1	Channel	0.994556	30	OASP1C	Success
PMN 1	Channel	1.26059	16	PMN1C	Success
PMN 2	Channel	0.81314	0	PMN2C	Unrestored
RJG 2	Channel	1.76107	39	RJG2C	Success
RJG1	Channel	0.767856	28	RJG1C	Success
SANG1	Channel	0.272522	9	SANG1C	Failure
SMG1	Channel	0.794043	15	SMG1C	Success
SSU 1	Channel	0.718971	45	SSU1C	Success
TCR1	Channel	0.292033	1	TCR1C	Failure
USCG1	Channel	1.46575	41	USCG1C	Success
WCR1	Channel	1.27548	0	WCR1C	Unrestored
WCR2	Channel	1.4393	23	WCR2C	Success
WCR3	Channel	0.899979	21	WCR3C	Success
WCR4	Channel	0.180769	24	WCR4C	Success
XYZ1	Channel	0.0487048	3	XYZ1C	Failure
ALP 1	Floodplain	9.29617	26	ALP1F	Success
ALP 2	Floodplain	4.00194	3	ALP2F	Failure
ALP 3	Floodplain	5.73553	17	ALP3F	Success
ALP 4	Floodplain	6.20537	16	ALP4F	Success
Bloom 2	Floodplain	6.72528	6	Bloom2F	Failure
Bloom1	Floodplain	5.35411	0	Bloom1F	Unrestored
DRG 1	Floodplain	4.22699	21	DRG1F	Success
DRG 2	Floodplain	3.07346	0	DRG2F	Unrestored
EDG 1	Floodplain	6.30275	9	EDG1F	Success
FCV 1	Floodplain	13.0333	33	FCV1F	Success
JKR 1	Floodplain	6.01048	0	JKR1F	Unrestored
JKT 1	Floodplain	6.20434	13	JKT1F	Success
JKT 2	Floodplain	11.6467	14	JKT2F	Success
JKT 3	Floodplain	4.94939	2	JKT3F	Success
JKT 4	Floodplain	5.62109	36	JKT4F	Success
KEN 1	Floodplain	4.8946	27	KEN1F	Failure
LAM 1	Floodplain	1.32468	0	LAM1F	Unrestored
LCV 1	Floodplain	8.13282	37	LCV1F	Success
LCV 2	Floodplain	2.90215	11	LCV2F	Success
MCS 1	Floodplain	4.12303	12	MCS1F	Success
MCS 2	Floodplain	4.84299	12	MCS2F	Success
MMM1	Floodplain	1.61714	0	MMM1F	Unrestored
MMM2	Floodplain	5.41471	0	MMM2F	Unrestored
Murphy 3	Floodplain	6.04473	9	Murphy3F	Success
Murphy 4	Floodplain	5.94225	0	Murphy4F	Unrestored
Murphy1	Floodplain	5.50146	0	Murphy1F	Unrestored
Murphy2	Floodplain	10.9308	7	Murphy2F	Success
OASP 1	Floodplain	5.56718	30	OASP1F	Success
PMN 1	Floodplain	10.9636	16	PMN1F	Success
PMN 2	Floodplain	10.0707	0	PMN2F	Unrestored
RJG 2	Floodplain	7.30758	39	RJG2F	Success
RJG1	Floodplain	6.97779	28	RJG1F	Success
SANG1	Floodplain	7.64998	9	SANG1F	Failure
SMG1	Floodplain	9.97007	15	SMG1F	Success
SSU 1	Floodplain	11.1044	45	SSU1F	Success
TCR1	Floodplain	3.77925	1	TCR1F	Failure
USCG1	Floodplain	8.05665	41	USCG1F	Success
WCR1	Floodplain	4.50961	0	WCR1F	Unrestored
WCR2	Floodplain	7.11269	23	WCR2F	Success
WCR3	Floodplain	6.79788	21	WCR3F	Success
WCR4	Floodplain	4.23248	24	WCR4F	Success
XYZ1	Floodplain	0.609974	3	XYZ1F	Failure
ALP 1	Upperbank	15.8921	26	ALP1U	Success
ALP 2	Upperbank	7.27687	3	ALP2U	Failure
ALP 3	Upperbank	4.14423	17	ALP3U	Failure
ALP 4	Upperbank	9.09697	16	ALP4U	Success
Bloom 2	Upperbank	7.70197	6	Bloom2U	Failure
Bloom1	Upperbank	6.78231	0	Bloom1U	Unrestored
DRG 1	Upperbank	8.00474	21	DRG1U	Failure
DRG 2	Upperbank	9.00833	0	DRG2U	Unrestored
EDG 1	Upperbank	5.41298	9	EDG1U	Failure
FCV 1	Upperbank	2.74231	33	FCV1U	Success
JKR 1	Upperbank	12.2624	0	JKR1U	Unrestored
JKT 1	Upperbank	8.83186	13	JKT1U	Success
JKT 2	Upperbank	7.93926	14	JKT2U	Success
JKT 3	Upperbank	10.2909	2	JKT3U	Failure
JKT 4	Upperbank	19.8834	36	JKT4U	Success
KEN 1	Upperbank	6.28852	27	KEN1U	Failure
LAM 1	Upperbank	8.04654	0	LAM1U	Unrestored
LCV 1	Upperbank	13.2625	37	LCV1U	Success
LCV 2	Upperbank	7.72671	11	LCV2U	Success
MCS 1	Upperbank	12.9725	12	MCS1U	Failure
MCS 2	Upperbank	10.095	12	MCS2U	Failure
MMM1	Upperbank	10.9447	0	MMM1U	Unrestored
MMM2	Upperbank	9.16957	0	MMM2U	Unrestored
Murphy 3	Upperbank	12.6715	9	Murphy3U	Success
Murphy 4	Upperbank	8.17217	0	Murphy4U	Unrestored
Murphy1	Upperbank	13.4691	0	Murphy1U	Unrestored
Murphy2	Upperbank	14.2236	7	Murphy2U	Failure
OASP 1	Upperbank	9.2889	30	OASP1U	Failure
PMN 1	Upperbank	8.39524	16	PMN1U	Success
PMN 2	Upperbank	8.8096	0	PMN2U	Unrestored
RJG 2	Upperbank	21.5877	39	RJG2U	Failure
RJG1	Upperbank	14.5842	28	RJG1U	Success
SANG1	Upperbank	4.06627	9	SANG1U	Failure
SMG1	Upperbank	15.9888	15	SMG1U	Failure
SSU 1	Upperbank	14.584	45	SSU1U	Success
TCR1	Upperbank	13.2676	1	TCR1U	Failure
USCG1	Upperbank	12.8362	41	USCG1U	Success
WCR1	Upperbank	5.17964	0	WCR1U	Unrestored
WCR2	Upperbank	12.6508	23	WCR2U	Success
WCR3	Upperbank	12.3567	21	WCR3U	Success
WCR4	Upperbank	9.10477	24	WCR4U	Success
XYZ1	Upperbank	9.15659	3	XYZ1U	Success

## Sheet: soil properties by landform
Site	Landform	Condition	wtBD	%C (top 50 cm)	%N (top 50 cm)	C:N (top 50 cm)	FA:HA (top 50 cm)	total C_kgm2	total N_kgm2	total labile C_kgm2	fraction_labile C
ALP 2	Floodplain	Unrestored	1.36914	0.595097	0.0573765	10.3718	1.18541	4.00194	0.385672	0.102915	0.0257163
ALP 2	Upper bank	Unrestored	1.35604	1.07975	0.103771	10.4051	0.933391	7.27687	0.698517	0.141779	0.0194835
ALP 3	Upper bank	Unrestored	1.44413	0.604761	0.0674361	8.96792	1.11867	4.14423	0.461362	0.116232	0.0280467
Bloom1	Floodplain	Unrestored	1.4731	0.912797	0.0816088	11.185	1.7836	5.35411	0.481931	0.157846	0.0294813
Bloom1	Upper bank	Unrestored	1.52808	0.98603	0.099659	9.89404	1.84293	6.78231	0.682139	0.190359	0.028067
DRG 1	Upper bank	Unrestored	1.44238	1.46367	0.126	11.6164		8.00474	0.683474	0.150623	0.0188167
EDG 1	Upper bank	Unrestored	1.5056	1.20349	0.0914524	13.1598	1.47297	5.41298	0.408856	0.104301	0.0192687
JKT 3	Upper bank	Unrestored	1.45247	1.58659	0.130718	12.1375		10.2909	0.847589	0.215879	0.0209777
KEN 1	Floodplain	Unrestored	1.175	0.758005	0.0661932	11.4514		4.8946	0.421334	0.11779	0.0240653
KEN 1	Upper bank	Unrestored	1.2549	0.9891	0.0881222	11.2242		6.28852	0.55851	0.134439	0.0213786
MCS 1	Upper bank	Unrestored	1.44998	1.91948	0.150377	12.7644	0.475865	12.9725	1.01618	0.27329	0.0210668
MCS 2	Upper bank	Unrestored	1.78113	1.40073	0.114067	12.2799	0.832679	10.095	0.827301	0.225583	0.0223461
Murphy 4	Upper bank	Unrestored	1.3357	1.21203	0.110004	11.018		8.17217	0.738242	0.163088	0.0199566
OASP 1	Upper bank	Unrestored	1.46652	1.47434	0.128913	11.4367	1.55643	9.2889	0.811905	0.203694	0.0219287
RJG1	Upper bank	Unrestored	1.69255	2.1881	0.185753	11.7796		14.5842	1.23492	0.246291	0.0168875
SANG1	Floodplain	Unrestored	1.07652	1.39875	0.0926174	15.1025		7.64998	0.536477	0.168891	0.0220773
SANG1	Upper bank	Unrestored	1.2783	1.11451	0.102304	10.8941		4.06627	0.359133	0.100664	0.0247559
SMG1	Upper bank	Unrestored	1.14659	2.97272	0.249273	11.9256	0.456884	15.9888	1.34078	0.245049	0.0153263
TCR1	Floodplain	Unrestored	1.47276	0.586901	0.0586521	10.0065		3.77925	0.370423	0.101892	0.0269609
TCR1	Upper bank	Unrestored	1.58598	1.81764	0.183254	9.91868		13.2676	1.32326	0.259091	0.0195281
XYZ1	Floodplain	Unrestored	1.09848	0.330108	0.0279799	11.7981	3.2274	0.609974	0.0486383	0.018001	0.0295111
ALP 1	Floodplain	Restored	1.17791	1.3521	0.111237	12.1551	0.755159	9.29617	0.764363	0.254839	0.0274134
ALP 1	Upper bank	Restored	1.53793	2.3657	0.185481	12.7544	0.575163	15.8921	1.24012	0.259282	0.0163152
ALP 3	Floodplain	Restored	1.21471	0.939366	0.0805471	11.6623	0.927757	5.73553	0.496311	0.151955	0.0264936
ALP 4	Floodplain	Restored	1.3016	0.991357	0.0791721	12.5215	0.912963	6.20537	0.492439	0.18071	0.0291216
ALP 4	Upper bank	Restored	1.36682	1.36009	0.124851	10.8938	0.96502	9.09697	0.835004	0.191718	0.021075
DRG 1	Floodplain	Restored	1.30854	0.679914	0.0559683	12.1482		4.22699	0.342477	0.120163	0.0284275
EDG 1	Floodplain	Restored	1.18762	1.09674	0.079675	13.7652	1.18237	6.30275	0.461096	0.14306	0.0226979
FCV 1	Floodplain	Restored	0.871624	2.61462	0.159804	16.3614	1.20726	13.0333	0.834871	0.234819	0.0180169
FCV 1	Upper bank	Restored	1.13845	0.683317	0.0564887	12.0965	1.76664	2.74231	0.219839	0.0730071	0.0266225
JKT 1	Floodplain	Restored	1.24784	1.08042	0.0904902	11.9396	0.765689	6.20434	0.516613	0.191653	0.0308901
JKT 1	Upper bank	Restored	1.38418	1.30532	0.0952982	13.6973	0.639641	8.83186	0.644819	0.202427	0.02292
JKT 2	Floodplain	Restored	1.04856	2.13653	0.16226	13.1673	0.866507	11.6467	0.895875	0.207497	0.0178159
JKT 2	Upper bank	Restored	1.26581	1.22931	0.104264	11.7903	0.937973	7.93926	0.672103	0.163141	0.0205487
JKT 3	Floodplain	Restored	1.50544	0.738379	0.0596724	12.3739		4.94939	0.398877	0.165367	0.0334115
JKT 4	Floodplain	Restored	1.21353	0.876598	0.0570056	15.3774	1.0878	5.62109	0.368591	0.184911	0.032896
JKT 4	Upper bank	Restored	1.4288	2.9466	0.209063	14.0943	0.275796	19.8834	1.41202	0.320172	0.0161025
LCV 1	Floodplain	Restored	0.993284	1.27953	0.0934133	13.6975		8.13282	0.609821	0.23823	0.0292924
LCV 1	Upper bank	Restored	1.76792	1.8467	0.130146	14.1894		13.2625	0.939508	0.268828	0.0202698
LCV 2	Floodplain	Restored	0.972095	0.656329	0.0501454	13.0885		2.90215	0.219921	0.072202	0.0248788
LCV 2	Upper bank	Restored	1.3565	1.56859	0.13574	11.5558		7.72671	0.665338	0.179124	0.0231824
MCS 1	Floodplain	Restored	1.08612	1.04342	0.0754363	13.8318	2.06653	4.12303	0.282204	0.0907817	0.0220182
MCS 2	Floodplain	Restored	1.12938	0.738383	0.051061	14.4608	1.83864	4.84299	0.345897	0.117188	0.0241975
Murphy1	Floodplain	Restored	1.48358	0.793291	0.0681044	11.6482	0.626851	5.50146	0.472928	0.130566	0.023733
Murphy1	Upper bank	Restored	1.44233	1.96019	0.185345	10.5759	0.848951	13.4691	1.27571	0.235156	0.017459
Murphy 4	Floodplain	Restored	1.31444	0.902762	0.0672325	13.4275		5.94225	0.444127	0.157931	0.0265777
OASP 1	Floodplain	Restored	1.08023	1.18179	0.0962249	12.2816	1.30464	5.56718	0.456087	0.170625	0.0306484
PMN 1	Floodplain	Restored	1.13832	1.8334	0.151826	12.0757	1.09826	10.9636	0.922137	0.202406	0.0184616
PMN 1	Upper bank	Restored	1.43647	1.22806	0.125127	9.81456	0.78685	8.39524	0.855744	0.18188	0.0216646
RJG1	Floodplain	Restored	1.23374	1.10148	0.0736625	14.9531		6.97779	0.472897	0.201583	0.0288892
RJG 2	Floodplain	Restored	1.26734	1.09351	0.0777363	14.067		7.30758	0.52518	0.280261	0.0383521
RJG 2	Upper bank	Restored	1.50435	3.28118	0.267654	12.2591		21.5877	1.76506	0.386404	0.0178993
SMG1	Floodplain	Restored	1.38971	1.63061	0.132567	12.3003	1.47486	9.97007	0.799195	0.241645	0.0242371
SSU 1	Floodplain	Restored	0.837543	1.99535	0.118488	16.8401	1.31632	11.1044	0.717351	0.282229	0.0254158
SSU 1	Upper bank	Restored	1.45102	2.13608	0.151075	14.1392	1.00362	14.584	1.03014	0.32421	0.0222305
USCG1	Floodplain	Restored	1.33073	1.20704	0.0866754	13.926	0.938794	8.05665	0.577334	0.226647	0.0281316
USCG1	Upper bank	Restored	1.44525	1.87172	0.122755	15.2476	0.681979	12.8362	0.840356	0.264201	0.0205825
WCR2	Floodplain	Restored	0.896216	1.38257	0.100544	13.7509		7.11269	0.532174	0.174569	0.0245433
WCR2	Upper bank	Restored	1.37523	2.17011	0.194926	11.133		12.6508	1.13337	0.218359	0.0172605
WCR3	Floodplain	Restored	1.2262	1.15409	0.0878241	13.141	0.826357	6.79788	0.517596	0.165021	0.0242753
WCR3	Upper bank	Restored	1.59917	1.99096	0.172053	11.5718	0.395678	12.3567	1.07017	0.228979	0.0185308
WCR4	Floodplain	Restored	1.1133	1.04237	0.0797067	13.0776	1.1139	4.23248	0.32759	0.121595	0.0287289
WCR4	Upper bank	Restored	1.37062	1.4282	0.122095	11.6974	1.10163	9.10477	0.776789	0.187576	0.020602
XYZ1	Upper bank	Restored	1.4221	1.70397	0.157803	10.7981	0.612084	9.15659	0.850494	0.176526	0.0192786
Bloom 2	Floodplain	Unrestored	1.49054	1.00766	0.0954072	10.5617	1.90898	6.72528	0.633207	0.184501	0.0274339
Bloom 2	Upper bank	Unrestored	1.46026	1.13141	0.114809	9.85478	1.48646	7.70197	0.780004	0.177369	0.0230291
DRG 2	Floodplain	Unrestored	1.61143	0.506135	0.0426031	11.8802		3.07346	0.25929	0.0839432	0.0273123
DRG 2	Upper bank	Unrestored	1.43423	1.37622	0.120549	11.4162		9.00833	0.784145	0.177368	0.0196894
JKR 1	Floodplain	Unrestored	1.49163	0.968618	0.0883648	10.9616		6.01048	0.546294	0.143151	0.0238169
JKR 1	Upper bank	Unrestored	1.38002	1.82787	0.168598	10.8416		12.2624	1.13008	0.254766	0.0207761
LAM 1	Floodplain	Unrestored	1.5376	0.46198	0.0415789	11.1109	2.47246	1.32468	0.116528	0.0373567	0.0282006
LAM 1	Upper bank	Unrestored	1.4076	1.56057	0.126094	12.3762	1.12387	8.04654	0.641389	0.166999	0.0207541
MMM1	Floodplain	Unrestored	1.60224	0.327163	0.0328551	9.95775	1.38544	1.61714	0.158055	0.0349304	0.0216001
MMM1	Upper bank	Unrestored	1.47057	1.73929	0.165165	10.5306	0.580037	10.9447	1.04097	0.230047	0.021019
MMM2	Floodplain	Unrestored	1.09921	1.00177	0.0740342	13.5312	1.04932	5.41471	0.410269	0.15709	0.0290116
MMM2	Upper bank	Unrestored	1.51615	1.44684	0.1371	10.5531	0.861774	9.16957	0.865954	0.191712	0.0209074
Murphy2	Floodplain	Unrestored	1.57911	1.60365	0.149497	10.7269	0.768668	10.9308	1.02251	0.208902	0.0191113
Murphy2	Upper bank	Unrestored	1.47716	2.11737	0.186958	11.3254	0.661423	14.2236	1.26113	0.237658	0.0167088
Murphy 3	Floodplain	Unrestored	1.21851	0.973048	0.074736	13.0198		6.04473	0.468863	0.162389	0.0268645
Murphy 3	Upper bank	Unrestored	1.34992	1.87429	0.169551	11.0545		12.6715	1.14015	0.24361	0.0192251
PMN 2	Floodplain	Unrestored	1.28493	1.55605	0.136904	11.366	0.799358	10.0707	0.889108	0.195144	0.0193775
PMN 2	Upper bank	Unrestored	1.40474	1.29354	0.125733	10.288	0.937334	8.8096	0.856282	0.191219	0.0217058
WCR1	Floodplain	Unrestored	1.45028	0.635784	0.0586758	10.8355		4.50961	0.412687	0.114664	0.0254265
WCR1	Upper bank	Unrestored	1.4971	1.03241	0.101825	10.1391		5.17964	0.509759	0.0981581	0.0189508

## Sheet: biomass C by age & success
age	Landform	Site	StatusCd	ABG_tonsC	BLG_tonsC	total_tonsC
9	Channel	Murphy1	Success	0.624667	0.209651	0.834318
39	Channel	RJG1	Success	1.35198	0.524296	1.87627
11	Channel	LCV2	Success	8.59793	2.86077	11.4587
9	Channel	EDG1	Success	9.2226	3.00255	12.2251
12	Channel	MCS1	Success	12.905	4.31321	17.2182
28	Channel	RJG2	Success	21.4935	7.80372	29.2972
21	Channel	WCR3	Success	26.2013	9.21062	35.4119
7	Channel	Murphy4	Success	53.5617	16.6515	70.2131
37	Channel	LCV1	Success	50.3849	18.6536	69.0384
13	Channel	JKT1	Success	62.0475	20.5445	82.592
21	Channel	DRG1	Success	77.1361	26.7871	103.923
26	Channel	ALP1	Success	82.8748	29.4056	112.28
24	Channel	WCR4	Success	85.3103	30.0078	115.318
16	Channel	PMN1	Success	89.3416	30.1064	119.448
30	Channel	OASP1	Success	91.1467	32.7927	123.939
14	Channel	JKT2	Success	156.377	51.6381	208.015
23	Channel	WCR2	Success	190.05	65.9537	256.004
15	Channel	SMG1	Success	230.316	76.2699	306.586
45	Channel	SSU1	Success	224.764	83.5091	308.273
12	Channel	MCS2	Success	314.363	101.346	415.71
41	Channel	USCG1	Success	284.641	104.453	389.094
33	Channel	FCV1	Success	450.44	160.752	611.193
0	Channel	BLOOM2	Unrestored	0	0	0
0	Channel	DRG2	Unrestored	0	0	0
0	Channel	JKR1	Unrestored	0	0	0
0	Channel	LAM1	Unrestored	0	0	0
0	Channel	MM1	Unrestored	0	0	0
0	Channel	MM2	Unrestored	0.311704	0	0.311704
0	Channel	Murphy2	Unrestored	0	0	0
0	Channel	Murphy3	Unrestored	0	0	0
0	Channel	PMN2	Unrestored	0	0	0
0	Channel	WCR1	Unrestored	0	0	0
30	Floodplain	OASP1	Success	5.44994	2.02419	7.47414
11	Floodplain	LCV2	Success	12.2803	4.06956	16.3499
26	Floodplain	ALP1	Success	25.6818	9.23384	34.9156
9	Floodplain	Murphy1	Success	37.5464	12.0314	49.5778
7	Floodplain	Murphy4	Success	40.9638	12.7736	53.7375
9	Floodplain	EDG1	Success	40.4888	12.9632	53.4519
17	Floodplain	ALP3	Success	41.5872	14.2256	55.8128
39	Floodplain	RJG1	Success	42.5224	15.8599	58.3823
45	Floodplain	SSU1	Success	43.4575	16.4489	59.9064
12	Floodplain	MCS1	Success	50.7588	16.7046	67.4634
13	Floodplain	JKT1	Success	62.0475	20.5445	82.592
15	Floodplain	SMG1	Success	66.3533	22.2843	88.6376
16	Floodplain	ALP4	Success	79.318	26.7646	106.083
28	Floodplain	RJG2	Success	75.1395	26.898	102.038
21	Floodplain	WCR3	Success	84.1216	29.1843	113.306
12	Floodplain	MCS2	Success	104.57	34.1337	138.704
21	Floodplain	DRG1	Success	111.251	38.4745	149.725
23	Floodplain	WCR2	Success	147.32	51.2723	198.592
14	Floodplain	JKT2	Success	172.423	56.8741	229.297
24	Floodplain	WCR4	Success	170.551	59.5234	230.074
16	Floodplain	PMN1	Success	354.353	117.565	471.918
36	Floodplain	JKT4	Success	352.281	127.223	479.504
41	Floodplain	USCG1	Success	418.696	152.978	571.675
33	Floodplain	FCV1	Success	569.68	202.768	772.448
0	Floodplain	BLOOM2	Unrestored	0	0	0
0	Floodplain	DRG2	Unrestored	0	0	0
0	Floodplain	JKR1	Unrestored	0	0	0
0	Floodplain	LAM1	Unrestored	0	0	0
0	Floodplain	MM1	Unrestored	0	0	0
0	Floodplain	MM2	Unrestored	1.03901	0	1.03901
0	Floodplain	Murphy2	Unrestored	0	0	0
0	Floodplain	Murphy3	Unrestored	0	0	0
0	Floodplain	PMN2	Unrestored	0	0	0
0	Floodplain	PMN2	Unrestored	0	0	0
0	Floodplain	WCR1	Unrestored	0	0	0
11	UpperBank	LCV2	Success	10.4391	3.46577	13.9049
9	UpperBank	Murphy1	Success	19.0856	6.16272	25.2483
9	UpperBank	EDG1	Success	24.8557	8.00197	32.8577
39	UpperBank	RJG1	Success	21.9372	8.24353	30.1807
12	UpperBank	MCS1	Success	31.8319	10.5312	42.3631
17	UpperBank	ALP3	Success	41.5872	14.2256	55.8128
7	UpperBank	Murphy4	Success	47.2627	14.714	61.9768
28	UpperBank	RJG2	Success	48.3165	17.3826	65.6991
30	UpperBank	OASP1	Success	48.2983	17.5019	65.8002
37	UpperBank	LCV1	Success	50.3849	18.6536	69.0384
21	UpperBank	WCR3	Success	55.1614	19.2286	74.3901
26	UpperBank	ALP1	Success	54.2783	19.3513	73.6296
13	UpperBank	JKT1	Success	62.0475	20.5445	82.592
16	UpperBank	ALP4	Success	79.318	26.7646	106.083
21	UpperBank	DRG1	Success	94.1934	32.6368	126.83
24	UpperBank	WCR4	Success	127.931	44.7939	172.725
15	UpperBank	SMG1	Success	148.335	49.3663	197.701
45	UpperBank	SSU1	Success	134.111	50.1193	184.23
14	UpperBank	JKT2	Success	164.4	54.2568	218.657
23	UpperBank	WCR2	Success	168.685	58.6183	227.303
12	UpperBank	MCS2	Success	209.467	67.8394	277.306
16	UpperBank	PMN1	Success	221.847	73.9939	295.841
36	UpperBank	JKT4	Success	352.281	127.223	479.504
41	UpperBank	USCG1	Success	351.669	128.742	480.411
33	UpperBank	FCV1	Success	510.06	181.774	691.834
0	UpperBank	BLOOM2	Unrestored	0	0	0
0	UpperBank	DRG2	Unrestored	0	0	0
0	UpperBank	JKR1	Unrestored	0	0	0
0	UpperBank	LAM1	Unrestored	0	0	0
0	UpperBank	MM1	Unrestored	0	0	0
0	UpperBank	MM2	Unrestored	0.675358	0	0.675358
0	UpperBank	Murphy2	Unrestored	0	0	0
0	UpperBank	Murphy3	Unrestored	0	0	0
0	UpperBank	WCR1	Unrestored	0	0	0

## Sheet: metadata
Metadata for files archived here
Field	Definition
age	age in years since the restoration project was installed
site	name of site, using a code to afford privacy to the landowners
landform	Channel = landform in stream bed extending from bankfull to the water's edge at the time of sampling; Floodplain = the first terrace(s) above the active channel that are frequently or infrequently flooded; Upper bank = the stream terrace above the hydrologic floodplain
stem #	an integer denoting individual stems within a single sample plot
siteplot	field is a combination of site and landform; each site has three landforms (C, F, and U)
uniquestem	field is a combination of siteplot and stem number; used to distinguish unique tree or shrub measurements from all others
habit	shrub or tree; only woody species are included in carbon estimates
species	a four-letter code; see list below
dbh_cm	diameter at breast height in cm
abg_kg	aboveground biomass of the individual tree or shrub, in kg; uses allometric equations from Jenkins et al. 2003 except for semi-woody shrubs (see paper)
ABG_tonsC	aboveground carbon in tons per ha
BLG_tonsC	belowground carbon in tons per ha
total_tonsC	sum of above- and below-ground carbon in tons per ha
StatusCd	Success=attempted and successful at restoring woody vegetation, Failure = attempted but failed at restorating woody vegetation, Unrestored = restoration not attempted
Condition	Restored = successful restoration (Success from StatusCd), Unrestored = StatusCd Failure or Unrestored
wtBD	soil bulk density to 50 cm depth, weighted by soil profile
%C	percent soil carbon in 50 cm depth (equivalent soil mass basis)
%N	percent soil nitrogen in 50 cm depth (equivalent soil mass basis)
C:N	ratio of %C to %N
FA:HA	ratio of fulvic to humic acids in top 50 cm of soil
total C_kgm2	total soil carbon stocks to 50 cm depth (equivalent soil mass basic) in kg per m2
total N_kgm2	total soil nitrogen stocks to 50 cm depth (equivalent soil mass basic) in kg per m2
total labile C_kgm2	total labile soil carbon stocks to 50 cm depth (equivalent soil mass basic) in kg per m2
fraction_labile C	portion of total C_kgm2 that is total labile C_kgm2
Species
ALRH	Alnus rhombifolia
BAPI	Baccharis pilularis
DEAD	dead tree (not identifiable)
ROCA	Rosa californica
RUDI	Rubus discolor
RUUR	Rubus ursinus
SAEX	Salix exigua
SALA	Salix lasiolepis
SALU	Salix lucida
SALV	Salix laevigata
SAME	Sambucus mexicana
SYAL	Symphoricarpos albus
